# Supplementary material for: Enhancing the reactivity of nickel(ii) in hydrogen evolution reactions (HERs) by β-hydrogenation of porphyrinoid ligands
Source: PubMed Central journal article supplement — Chem Sci. 2017 Jun 19;8(9):5953–61. doi: 10.1039/c7sc02073b (PMC5620542; doi:10.1039/c7sc02073b), 2017-06-19
Supplement: SC-008-C7SC02073B-s001.pdf [file SC-008-C7SC02073B-s001.pdf]

# Supporting Information

## Enhancing the Reactivity of Nickel(II) in Hydrogen Evolution Reactions (HERs) by $\beta$ -Hydrogenation of Porphyrinoid Ligands

Zhuo-Yan Wu<sup>a</sup>, Teng Wang<sup>a</sup>, Yin-Shan Meng<sup>a</sup>, Yu Rao<sup>a</sup>, Bing-Wu Wang<sup>a\*</sup>, Jie Zheng<sup>a\*</sup>, Song Gao<sup>a</sup> and Jun-Long Zhang<sup>a\*</sup>

<sup>a</sup>Beijing National Laboratory for Molecular Sciences  
State Key Laboratory of Rare Earth Materials Chemistry and Applications, College of Chemistry and Molecular Engineering  
Peking University  
Beijing 100871 (P.R. China)

## Table of Contents

|                                                                                         |    |
|-----------------------------------------------------------------------------------------|----|
| Table of Contents.....                                                                  | 2  |
| 1. General .....                                                                        | 3  |
| 2. Synthesis .....                                                                      | 3  |
| 2.1 Porphyrin ligands .....                                                             | 3  |
| 2.2 Synthesis of Ni-1 .....                                                             | 3  |
| 2.3 Synthesis of Ni-2 .....                                                             | 3  |
| 2.4 Synthesis of Ni-3 .....                                                             | 3  |
| 2.5 Synthesis of Ni-4 .....                                                             | 4  |
| 2.6 Summary of Crystallographic Data.....                                               | 5  |
| 2.7 ESI-MS spectra .....                                                                | 6  |
| 2.8 $^1\text{H}$ , $^{19}\text{F}$ , $^{13}\text{C}$ and $^2\text{D}$ NMR spectra ..... | 8  |
| 3. Electrochemistry.....                                                                | 11 |
| 3.1 General .....                                                                       | 11 |
| 3.2 HER process.....                                                                    | 11 |
| 3.3 Catalytic hydrogen production using TFA as acid.....                                | 11 |
| 4. Chemistry titration.....                                                             | 16 |
| 5. Computational details .....                                                          | 17 |
| 5.1. General .....                                                                      | 17 |
| 5.2. Energy plot.....                                                                   | 23 |
| 5.3. Cartesian Coordinates for Key Species .....                                        | 24 |
| References .....                                                                        | 48 |

## 1. General

UV-vis spectra were recorded on an Agilent 8453 UV-vis spectrometer equipped with an Agilent 89090A thermostat ( $\pm 0.1$  °C). ESI-MS were recorded on Bruker APEX IV Fourier Transform Ion Cyclotron Resonance Mass Spectrometer using electrospray ionization.  $^1\text{H}$ ,  $^{19}\text{F}$  and  $^{13}\text{C}$  NMR spectra were recorded on Bruker-400 MHz NMR. All  $^1\text{H}$  NMR experiments were reported in  $\delta$  units, parts per million (ppm), all coupling constants were in Hz and measured relative to the signal for residual chloroform (7.26 ppm) in the deuterated solvent  $\text{CDCl}_3$ . For  $^{19}\text{F}$  NMR spectra,  $\text{CF}_3\text{COOH}$  was used as external reference at 0 ppm. Transmission electron microscopy were determined by JEM-2100F(JEOL). DLS measurements were performed by using a Laser Light Scattering Spectrometer (ALV/Laser Vertriebsgesellschaft m.b.H), which can detect particle sizes ranging from 1.0 nm-1.0  $\mu\text{m}$ . SEM and EDX were performed by using Hitachi S-4800 field emission scanning electron microscope at an accelerating voltage of 5 and 15 kV, respectively.  $\text{CH}_3\text{CN}$  and dimethylformamide was distilled and degassed before use. Tetrabutylammonium hexafluorophosphate ( $^n\text{Bu}_4\text{NPF}_6$ ) was recrystallized from absolute ethanol. Other commercially available reagents were used without further purification.

## 2. Synthesis

### 2.1 Porphyrin ligands

*Meso*-tetrakis(pentafluorophenyl)porphyrin (**1**), *meso*-tetrakis(pentafluorophenyl)chlorin (**2**), *meso*-tetrakis(pentafluorophenyl)porpholactone (**3**) and *adjacent*-hydroporpholactone (**4**) was synthesized according to the literature.<sup>[1]</sup>

### 2.2 Synthesis of Ni-1

Nickel-*meso*-tetrakis(pentafluorophenyl)porphyrin (Ni-1)

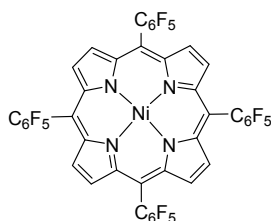

**1** (0.1 mmol) was refluxed with 30 equivalents of  $\text{Ni}(\text{OAc})_2$  (1.0 mmol, 180 mg) in acetonitrile under nitrogen for 6 hours. The solvent was removed by adding 100 equivalents of water and the residue was purified through silica column. Isolated yields were over 90%. Eluent: ethyl acetate: petroleum ether, 1:5.  $^1\text{H}$  NMR (400 MHz,  $\text{CDCl}_3$ )  $\delta$  8.81 (s, 8H).  $^{19}\text{F}$  NMR (377 MHz,  $\text{CDCl}_3$ )  $\delta$  -136.47 (dd,  $J = 23.2, 7.7$  Hz, 8F), -150.17 (m, 4H), -161.32 (dt,  $J = 22.5, 7.4$  Hz, 8F).  $^{13}\text{C}$  NMR (101 MHz,  $\text{CDCl}_3$ )  $\delta$  142.98 (s), 132.52 (s), 103.09 (s). ESI-MS  $m/z$ : Calcd. For  $\text{C}_{44}\text{H}_8\text{F}_{20}\text{N}_4\text{Ni}$  1029.97831, found 1029.97854. Anal. Calcd for  $\text{C}_{44}\text{H}_8\text{F}_{20}\text{N}_4\text{Ni}$ : C, 51.25; H, 0.78; N, 5.43, found C, 51.29; H, 0.92; N, 5.38.

### 2.3 Synthesis of Ni-2

Nickel-*meso*-tetrakis(pentafluorophenyl)chlorin (Ni-2)

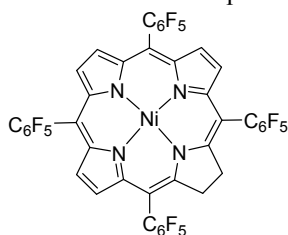

**2** (0.1 mmol) was refluxed with 30 equivalents of  $\text{Ni}(\text{OAc})_2$  (1 mmol, 180 mg) in acetonitrile under nitrogen for 1 hours. The solvent was removed by adding 100 equivalents of water and the residue was purified through silica column. Isolated yields were 75%. Eluent: ethyl acetate: petroleum ether, 1: 4.  $^1\text{H}$  NMR (400 MHz,  $\text{CDCl}_3$ )  $\delta$  8.29 (d,  $J = 4.9$  Hz, 2H), 8.14 (s, 2H), 7.95 (d,  $J = 5.0$  Hz, 2H), 3.93 (s, 4H).  $^{19}\text{F}$  NMR (377 MHz,  $\text{CDCl}_3$ )  $\delta$  -136.94 (dd,  $J = 23.2, 7.7$  Hz, 4F), -137.89 (dd,  $J = 23.8, 8.3$  Hz, 4F), -151.88 (t,  $J = 20.9$  Hz, 2F), -152.10 (t,  $J = 20.9$  Hz, 2F), -160.66 (dt,  $J = 23.3, 8.0$  Hz, 4F), -161.57 (dt,  $J = 22.6, 7.4$  Hz, 4F).  $^{13}\text{C}$  NMR (101 MHz,  $\text{CDCl}_3$ )  $\delta$  169.03 (s), 152.66 (s), 140.39 (s), 135.31 (s), 132.27 (s), 128.22 (s), 123.62 (s), 106.31 (s), 96.83 (s), 35.31 (s,  $-\text{CH}_2-$ ). ESI-MS  $m/z$ : Calcd. For  $\text{C}_{44}\text{H}_{10}\text{F}_{20}\text{N}_4\text{Ni}$  1031.99396, found 1031.98981. Anal. Calcd for  $\text{C}_{44}\text{H}_{10}\text{F}_{20}\text{N}_4\text{Ni}$ : C, 51.15; H, 0.98; N, 5.42, found C, 51.16; H, 1.14; N, 5.31.

### 2.4 Synthesis of Ni-3

Nickel-*meso*-tetrakis(pentafluorophenyl)porpholactone (Ni-3)

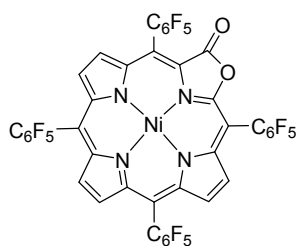

**3** (0.1 mmol) was refluxed with 30 equivalents of Ni(OAc)<sub>2</sub> (1.0 mmol, 180 mg) in acetonitrile under nitrogen for 6 hours. The solvent was removed by adding 100 equivalents of water and the residue was purified through silica column. Isolated yields were over 90%. Eluent: ethyl acetate: petroleum ether, 1:5. <sup>1</sup>H NMR (400 MHz, CDCl<sub>3</sub>) δ 8.67 (d, *J* = 5.1 Hz, 1H), 8.65 – 8.61 (m, 2H), 8.58 (d, *J* = 5.1 Hz, 1H), 8.55 (d, *J* = 4.9 Hz, 2H). <sup>19</sup>F NMR (377 MHz, CDCl<sub>3</sub>) δ -136.69 – -136.96 (m), -138.17 – -138.39 (m), -150.28 – -150.62 (m), -151.20 (q, *J* = 20.9 Hz), -160.27 – -160.87 (m), -161.37 (qd, *J* = 22.1, 6.8 Hz). <sup>13</sup>C NMR (101 MHz, CDCl<sub>3</sub>) δ 163.03 (s), 149.75 (s), 144.95 (s), 134.45 (s), 132.47 (d), 131.78 (s), 131.17 (s), 130.34 (s), 120.59 (s). ESI-MS *m/z*: Calcd. For C<sub>43</sub>H<sub>6</sub>F<sub>20</sub>N<sub>4</sub>NiO<sub>2</sub> M:1048.95556, found 1048.95959. Anal. Calcd for C<sub>43</sub>H<sub>6</sub>F<sub>20</sub>N<sub>4</sub>NiO<sub>2</sub>: C, 49.23; H, 0.58; N, 5.34, found C, 48.66; H, 0.67; N, 5.26.

## 2.5 Synthesis of Ni-4

Nickel- *adjacent*-hydroporpholactone (Ni-4)

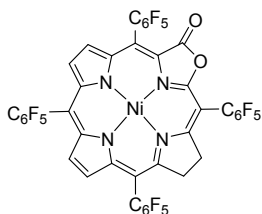

**4** (0.1 mmol) was refluxed with 30 equivalents of Ni(OAc)<sub>2</sub> (1.0 mmol, 180 mg) in acetonitrile under nitrogen for 1 hours. The solvent was removed by adding 100 equivalents of water and the residue was purified through silica column. Isolated yields were over 90%. Eluent: ethyl acetate: petroleum ether, 1:5. <sup>1</sup>H NMR (400 MHz, CDCl<sub>3</sub>) δ 7.97 (d, *J* = 4.8 Hz, 1H), 7.77 (dd, *J* = 20.5, 4.5 Hz, 2H), 7.54 (d, *J* = 4.7 Hz, 1H), 3.76 (d, *J* = 8.4 Hz, 2H), 3.66 (d, *J* = 8.4 Hz, 2H). <sup>19</sup>F NMR (377 MHz, CDCl<sub>3</sub>) δ -137.63 (d, *J* = 23.9 Hz), -137.89 (d, *J* = 15.5 Hz), -138.76 (d, *J* = 15.8 Hz), -151.16 (d, *J* = 34.0 Hz), -151.50 (s), -151.79 (s), -160.07 (d, *J* = 6.2 Hz), -160.31 (d, *J* = 5.9 Hz), -160.68 (d, *J* = 6.1 Hz), -161.42 (d, *J* = 5.9 Hz). <sup>13</sup>C NMR (101 MHz, CDCl<sub>3</sub>) δ 165.72 (s, -C=O), 162.06 (s), 156.20 (s), 151.18 (s), 149.93 (s), 141.77 (s), 139.34 (s), 138.75 (s), 133.28 (s), 127.83 (s), 126.19 (s), 115.90 (s), 96.88 (s), 82.19 (s), 34.40 (s, -CH<sub>2</sub>-), 32.29 (s, -CH<sub>2</sub>-). Calcd. For C<sub>43</sub>H<sub>8</sub>F<sub>20</sub>N<sub>4</sub>NiO<sub>2</sub> [M+H]<sup>+</sup>:1050.97586, found 1050.97686. Anal. Calcd for C<sub>43</sub>H<sub>8</sub>F<sub>20</sub>N<sub>4</sub>NiO<sub>2</sub>: C, 49.13; H, 0.77; N, 5.33, found C, 48.96; H, 0.93; N, 5.20.

## 2.6 Summary of Crystallographic Data

**Table S1.** Crystal data and structure refinement

| Complex                                          | Ni-1                                                             | Ni-2                                                              | Ni-3                                                                           | Ni-4                                                                           |
|--------------------------------------------------|------------------------------------------------------------------|-------------------------------------------------------------------|--------------------------------------------------------------------------------|--------------------------------------------------------------------------------|
| molecular formula                                | C <sub>44</sub> H <sub>8</sub> F <sub>20</sub> N <sub>4</sub> Ni | C <sub>44</sub> H <sub>10</sub> F <sub>20</sub> N <sub>4</sub> Ni | C <sub>43</sub> H <sub>6</sub> F <sub>20</sub> N <sub>4</sub> NiO <sub>2</sub> | C <sub>43</sub> H <sub>8</sub> F <sub>20</sub> N <sub>4</sub> NiO <sub>2</sub> |
| formula wt. (g mol <sup>-1</sup> )               | 1031.25                                                          | 1033.25                                                           | 1049.21                                                                        | 1051.22                                                                        |
| temperature (K)                                  | 200(2)                                                           | 180.01(10)                                                        | 180.01(10)                                                                     | 180.01(10)                                                                     |
| radiation (λ, Å)                                 | 0.71073                                                          | 0.71073                                                           | 0.71073                                                                        | 0.71073                                                                        |
| crystal system                                   | tetragonal                                                       | tetragonal                                                        | trigonal                                                                       | tetragonal                                                                     |
| space group                                      | <i>I</i> 42 <i>d</i>                                             | <i>I</i> 42 <i>d</i>                                              | <i>R</i> $\bar{3}$                                                             | <i>I</i> 41/ <i>a</i>                                                          |
| <i>a</i> (Å)                                     | 15.4077(6)                                                       | 15.4001(2)                                                        | 20.0377(5)                                                                     | 15.3093(2)                                                                     |
| <i>b</i> (Å)                                     | 15.4077(6)                                                       | 15.4001(2)                                                        | 20.0377(5)                                                                     | 15.3093(2)                                                                     |
| <i>c</i> (Å)                                     | 15.3877(7)                                                       | 15.3253(4)                                                        | 24.6135(9)                                                                     | 15.8346(4)                                                                     |
| <i>α</i> (°)                                     | 90                                                               | 90                                                                | 90                                                                             | 90                                                                             |
| <i>β</i> (°)                                     | 90                                                               | 90                                                                | 90                                                                             | 90                                                                             |
| <i>γ</i> (°)                                     | 90                                                               | 90                                                                | 120                                                                            | 90                                                                             |
| Volume (Å <sup>3</sup> )                         | 3653.0(3)                                                        | 3634.59(15)                                                       | 8558.5(5)                                                                      | 3711.23(13)                                                                    |
| <i>Z</i>                                         | 4                                                                | 4                                                                 | 9                                                                              | 4                                                                              |
| $\rho_{\text{calcd}}$ (g cm <sup>-3</sup> )      | 1.875                                                            | 1.885                                                             | 1.830                                                                          | 1.872                                                                          |
| $\mu$ (mm <sup>-1</sup> )                        | 0.678                                                            | 0.681                                                             | 0.656                                                                          | 0.673                                                                          |
| F(000)                                           | 2032                                                             | 2032                                                              | 4635                                                                           | 2052                                                                           |
| crystal size (mm <sup>3</sup> )                  | 0.20 × 0.20 × 0.15                                               | 0.32 × 0.28 × 0.15                                                | 0.32 × 0.25 × 0.15                                                             | 0.25 × 0.20 × 0.18                                                             |
| Theta range                                      | 1.87, 27.41                                                      | 3.243, 30.257                                                     | 3.520, 27.478                                                                  | 3.702, 27.481                                                                  |
| reflections collected                            | 2076                                                             | 2633                                                              | 4340                                                                           | 2127                                                                           |
| independent reflections                          | 2007                                                             | 2380                                                              | 3677                                                                           | 2051                                                                           |
| Completeness                                     | 97                                                               | 99.67                                                             | 99.70                                                                          | 99.68                                                                          |
| goodness-of-fit on F <sup>2</sup>                | 1.042                                                            | 1.098                                                             | 1.162                                                                          | 1.048                                                                          |
| final R indices [R > 2σ(I)]                      | 0.0278, 0.0689                                                   | 0.0353, 0.0874                                                    | 0.0634, 0.1342                                                                 | 0.0366, 0.0366                                                                 |
| R indices (all data)                             | 0.0291, 0.0698                                                   | 0.0432, 0.0933                                                    | 0.0756, 0.1418                                                                 | 0.0374, 0.1064                                                                 |
| largest diff. peak and hole (e Å <sup>-3</sup> ) | 0.223, -0.269                                                    | 0.314, -0.240                                                     | 0.360, -0.393                                                                  | 0.601, -0.436                                                                  |

**Table S2.** Selected bond length for nickel complexes.

| Complex         | Ni-1     | Ni-2     | Ni-3     | Ni-4       |
|-----------------|----------|----------|----------|------------|
| C-C / Å         | 1.346(4) | 1.383(5) | 1.341(5) | 1.404(3)   |
|                 | 1.346(4) | 1.383(5) | 1.338(5) | 1.404(3)   |
|                 | 1.346(4) | 1.383(5) | 1.341(5) | 1.404(3)   |
|                 | 1.346(4) | 1.383(5) | 1.338(5) | 1.404(3)   |
| Ni-N / Å        | 1.925(2) | 1.925(2) | 1.950(3) | 1.9210(15) |
|                 | 1.925(2) | 1.925(2) | 1.950(3) | 1.9210(15) |
|                 | 1.925(2) | 1.925(2) | 1.945(3) | 1.9210(15) |
|                 | 1.925(2) | 1.925(2) | 1.945(3) | 1.9210(15) |
| Ni-N4 plane / Å | 0        | 0        | 0        | 0          |

## 2.7 ESI-MS spectra

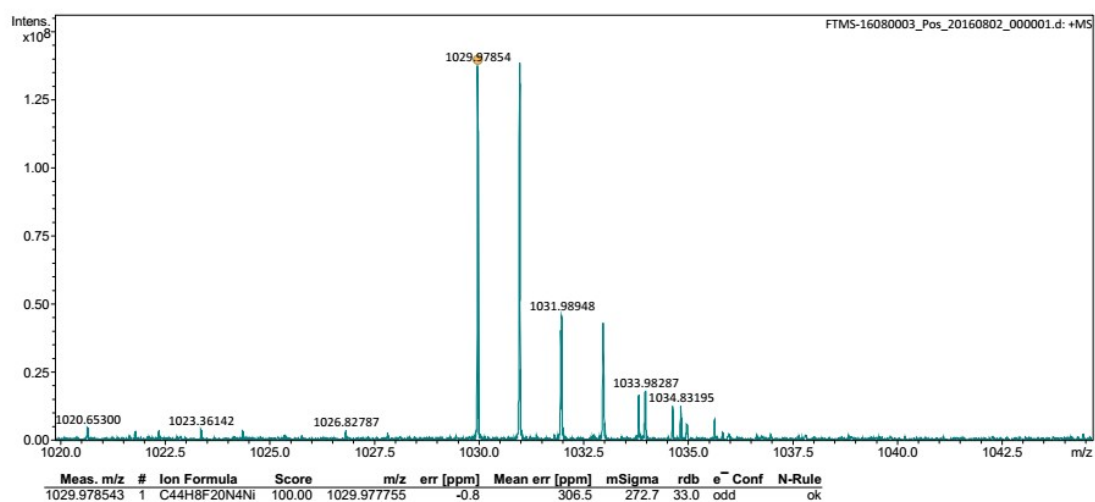

Fig. S1 HR-MS(ESI) of Ni-1.

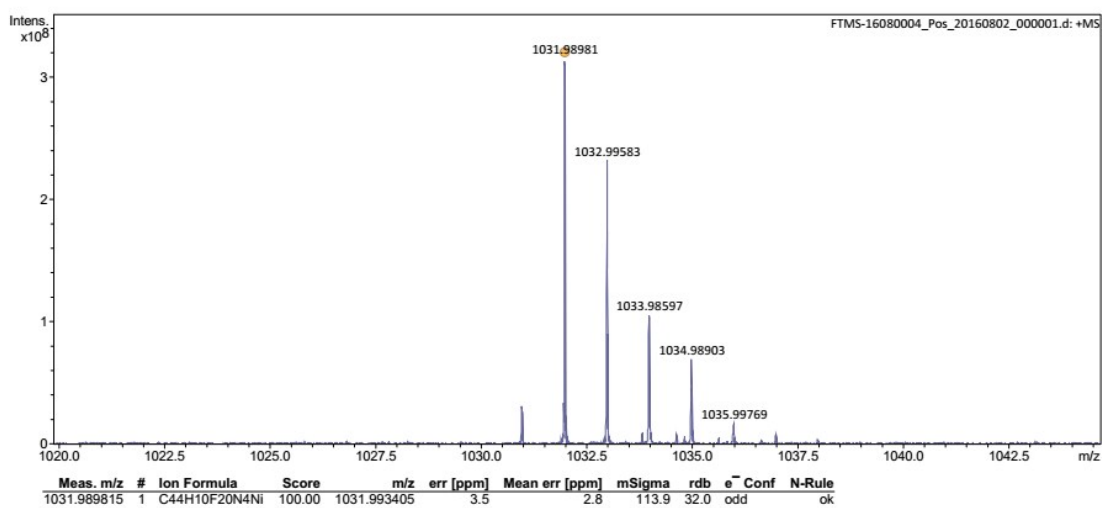

Fig. S2 HR-MS(ESI) of Ni-2.

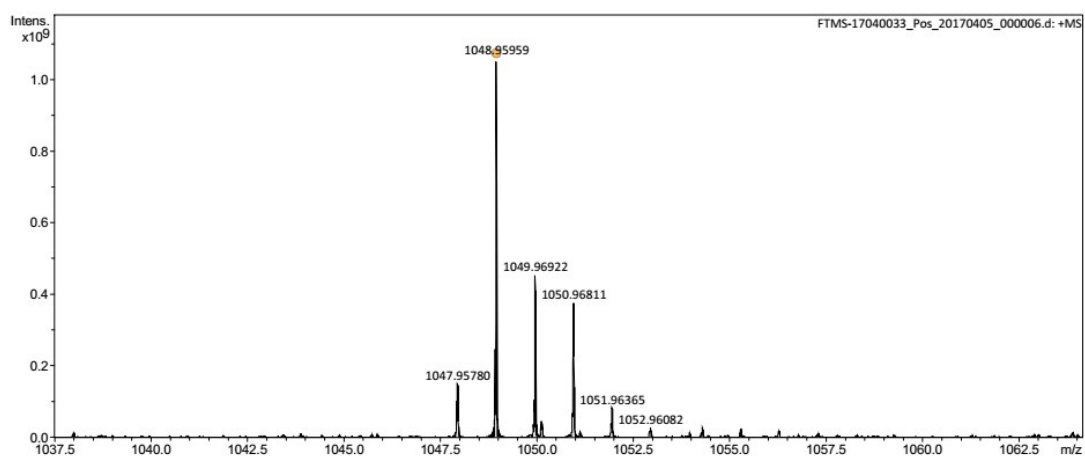

Fig. S3 HR-MS(ESI) of Ni-3.

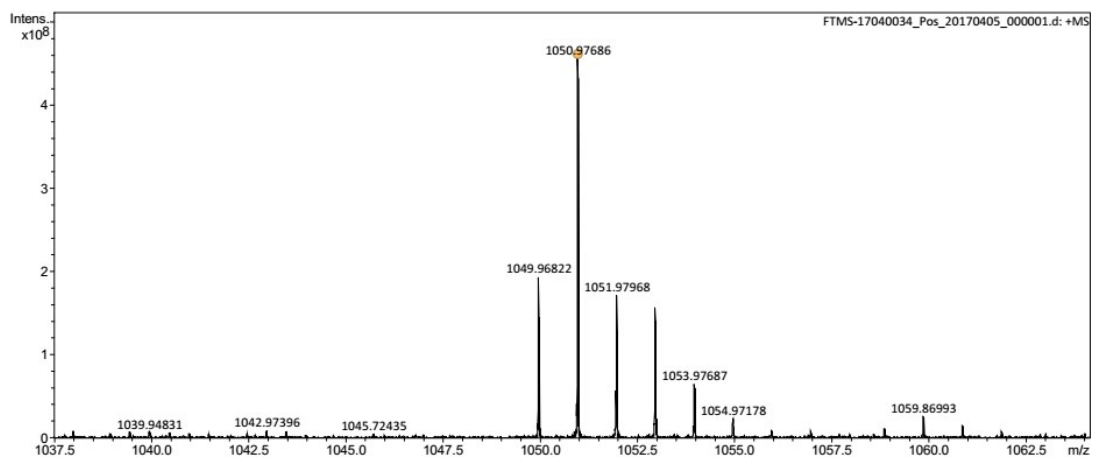

Fig. S4 HR-MS(ESI) of Ni-4.

## 2.8 $^1\text{H}$ , $^{19}\text{F}$ , $^{13}\text{C}$ and $^2\text{D}$ NMR spectra

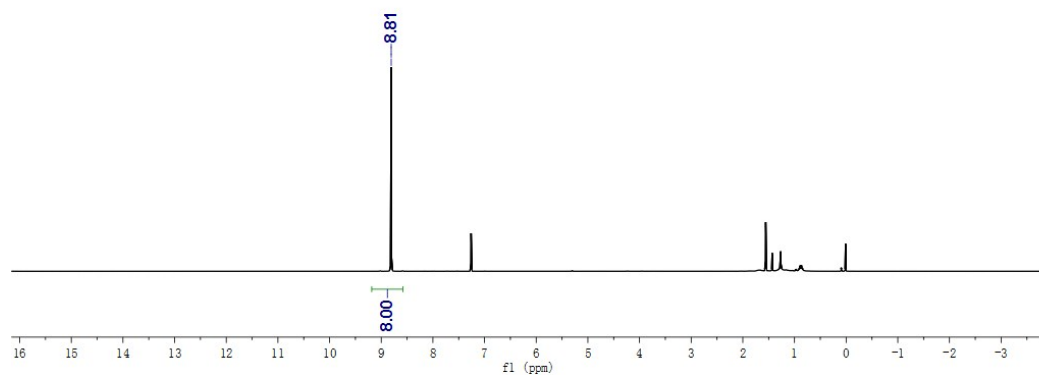

Fig. S5  $^1\text{H}$  NMR of Ni-1 in  $\text{CDCl}_3$ .

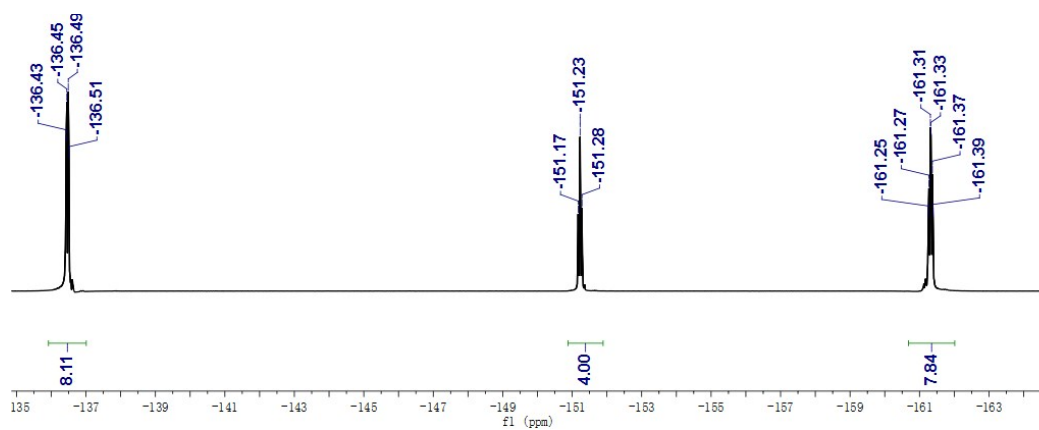

Fig. S6  $^{19}\text{F}$  NMR of Ni-1 in  $\text{CDCl}_3$ .

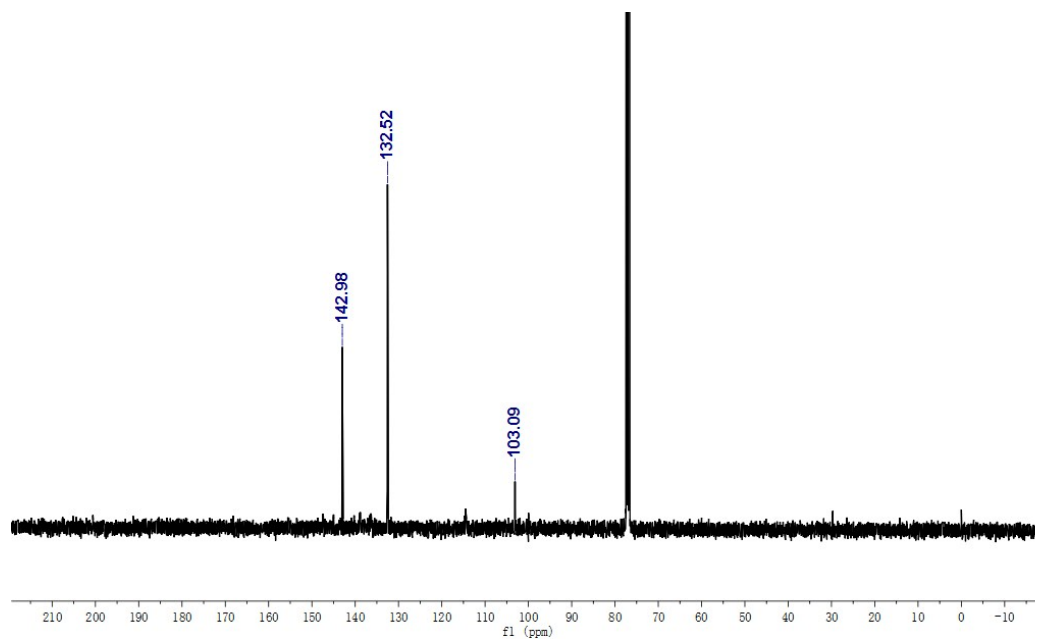

Fig. S7  $^{13}\text{C}$  NMR of Ni-1 in  $\text{CDCl}_3$ .



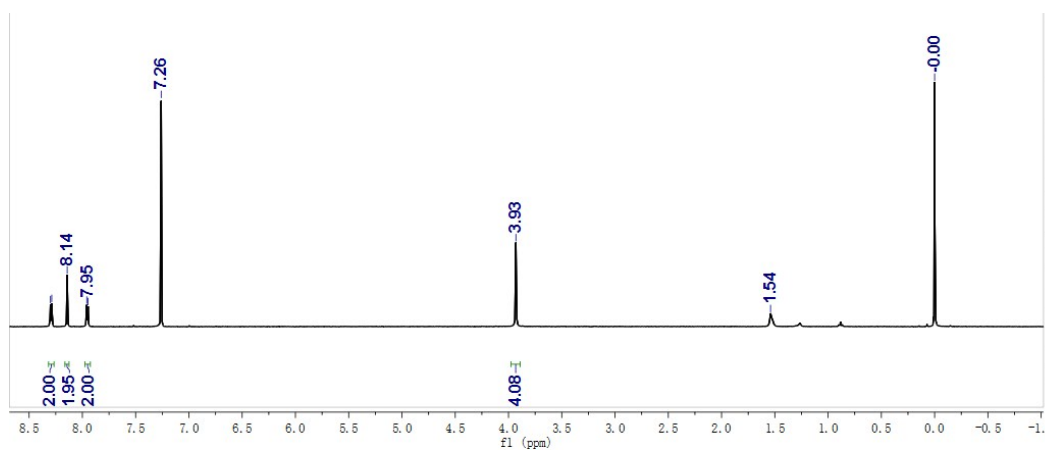

Fig. S8  $^1\text{H}$  NMR of Ni-2 in  $\text{CDCl}_3$ .

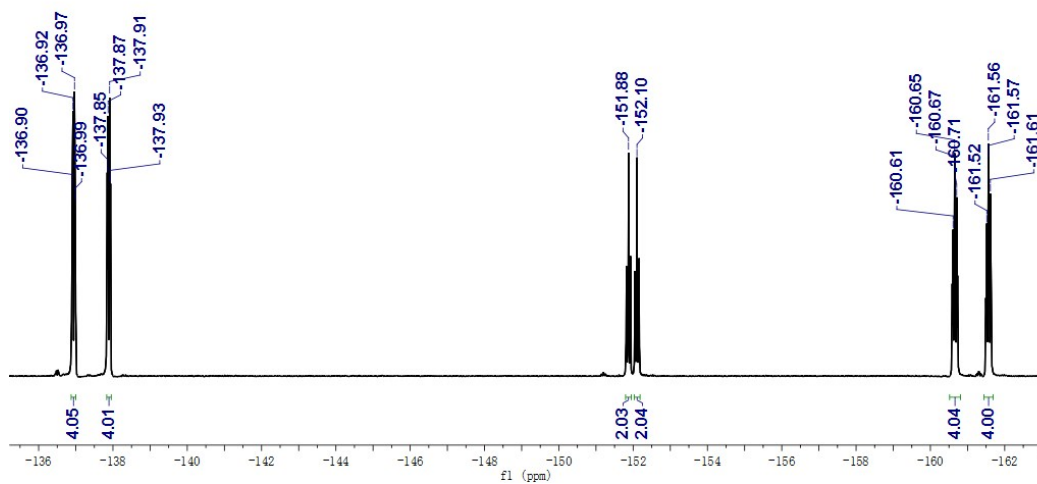

Fig. S9  $^{19}\text{F}$  NMR of Ni-2 in  $\text{CDCl}_3$ .

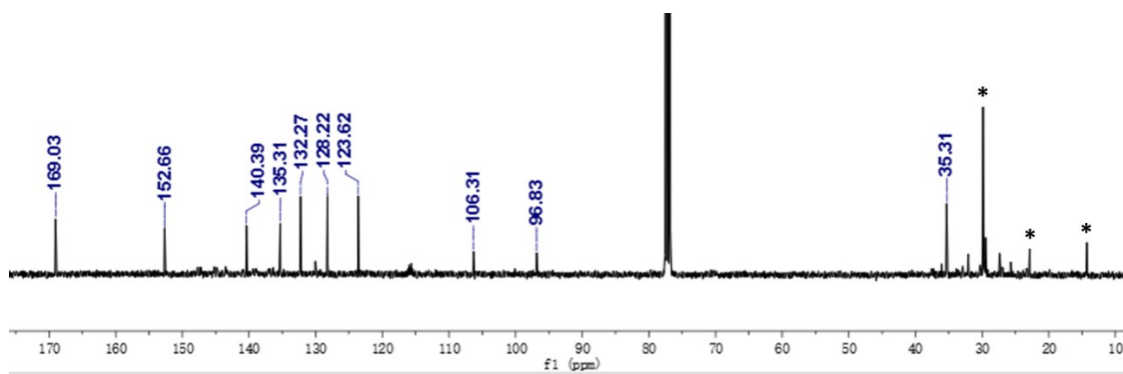

Fig. S10  $^{13}\text{C}$  NMR of Ni-2 in  $\text{CDCl}_3$ . \* refers to the residual n-hexane.

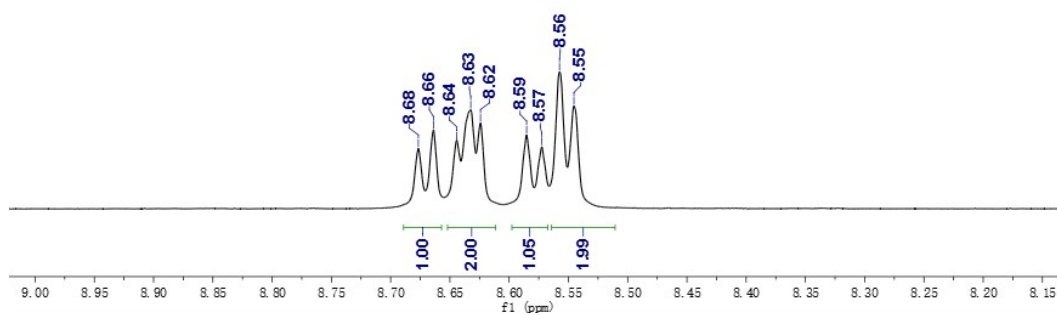

Fig. S11  $^1\text{H}$  NMR of Ni-3 in  $\text{CDCl}_3$ .

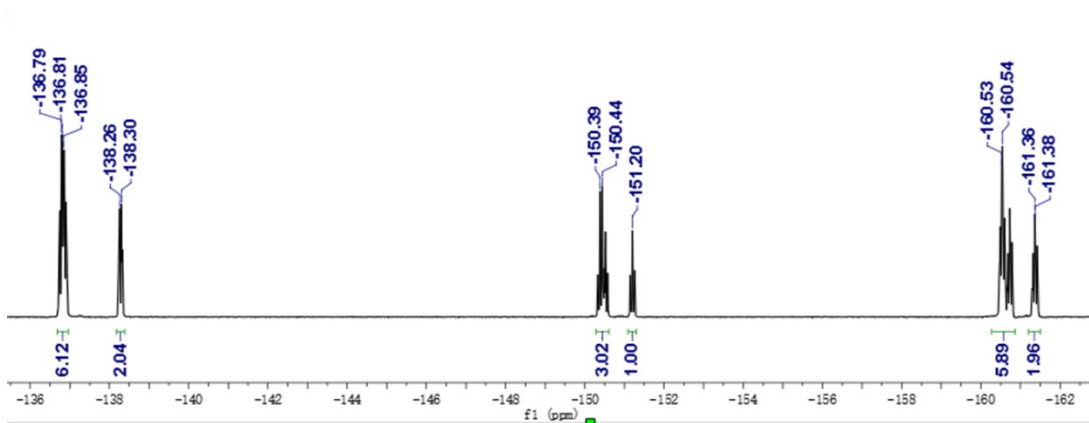

Fig. S12  $^{19}\text{F}$  NMR of Ni-3 in  $\text{CDCl}_3$ .

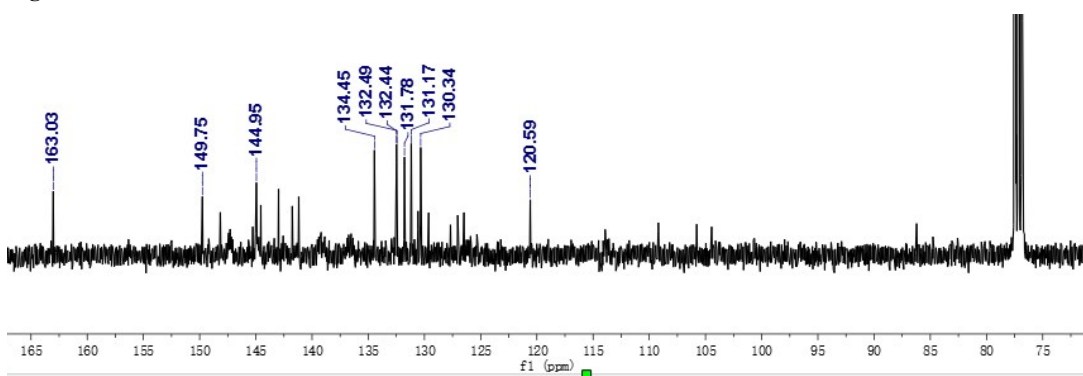

Fig. S13  $^{13}\text{C}$  NMR of Ni-3 in  $\text{CDCl}_3$ .

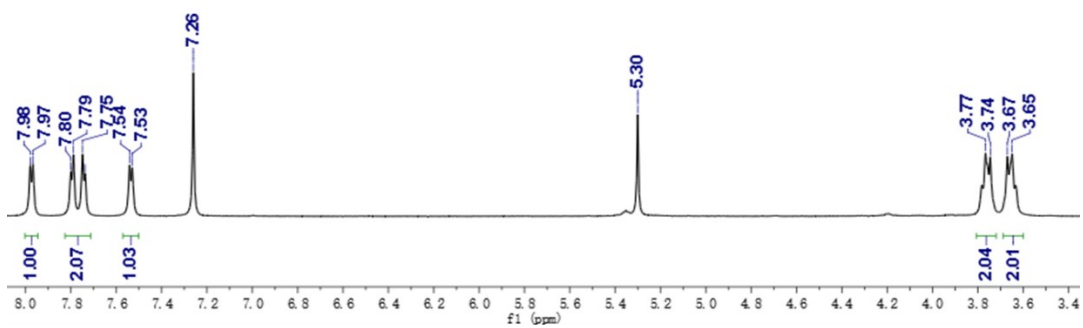

Fig. S14  $^1\text{H}$  NMR of Ni-4 in  $\text{CDCl}_3$ .

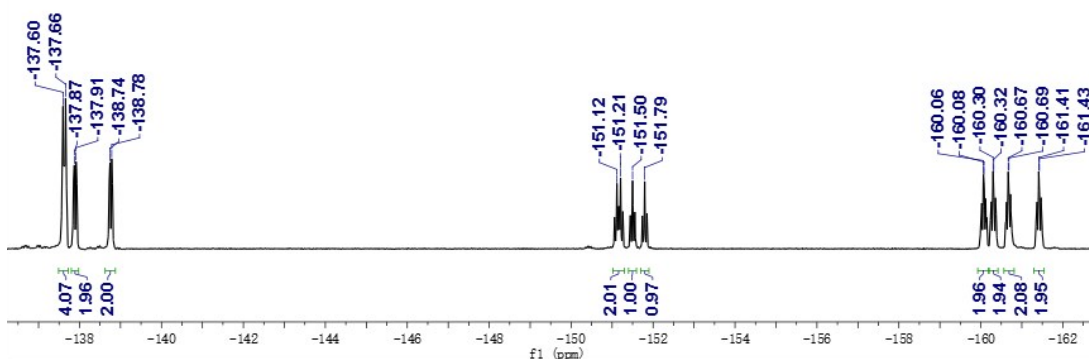

Fig. S15  $^{19}\text{F}$  NMR of Ni-4 in  $\text{CDCl}_3$ .

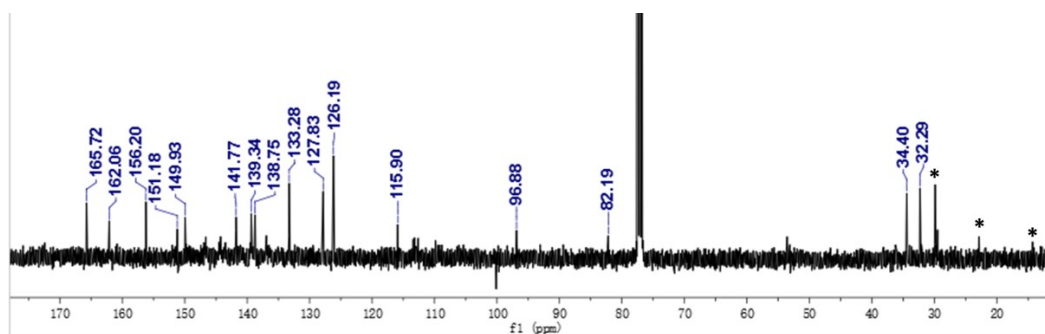

Fig. S16  $^{13}\text{C}$  NMR of Ni-4 in  $\text{CDCl}_3$ . \* refers to the residual n-hexane.

### 3. Electrochemistry

#### 3.1 General

All the electrochemistry experimental procedures were conducted with a standard three-electrode configuration on Shanghai Chenhua CHI660C electrochemical workstation at room temperature, 25 °C, under argon or a vacuum atmospheres.

Cyclic voltammetry experiments were recorded using glassy-carbon working electrode disks of 3mm diameter (Cypress Systems EE040). The working electrode was treated between scans by means of a sequence of polishing with diamond paste (Buehler) of decreasing sizes (3 to 0.05  $\mu\text{m}$ ) interspersed by washings with purified  $\text{H}_2\text{O}$ . Auxiliary electrode was platinum wire electrode and Ag/AgCl electrode was reference electrode. All glassware for electrochemical experiments was oven dried overnight and allowed to cool to room temperature before use. Ferrocene was used as an internal standard, and all potentials reported in this work are referenced to ferrocenium/ferrocene ( $\text{Fc}^+/\text{Fc}$ ) couple at 0 V.

Spectroelectrochemical measurements were carried out in a quartz cell with an optical path length of 1 mm. A platinum net, a platinum filament and an Ag/AgCl were used as working electrode, counter electrode, and reference electrode, respectively. The sample solutions were deaerated with acetonitrile-saturated argon. The spectra were recorded on an Agilent 8453 UV-vis spectrophotometer during electrolysis on a CHI 660C instrument.

Controlled potential electrolyses were performed using a CHI 760D electrochemistry workstation, the working electrode is the GCE plate (1 cm  $\times$  1 cm). A clean platinum foil is used as counter electrode. A saturated Ag/AgCl electrode is used as reference electrode. The electrolyte was deoxygenized in which the solved air had been removed under vacuum. During the test, the evolved hydrogen was introduced into the gas chromatograph (GC, GC3420, Beifen Instrument), then quantified by the integrated areas of the peaks corresponding to hydrogen.

#### 3.2 HER process

Typical Experimental Conditions: 1.0 mmol of Ni-1, Ni-2, Ni-3 or Ni-4 was weighed into an electrochemical cell and dissolved in 14 mL of a supporting electrolyte solution (0.10 M  $^n\text{Bu}_4\text{PF}_6 / \text{CH}_3\text{CN}$ ). Purity of the electrolyte medium was confirmed over the available electrochemical window through background scans taken prior to addition of analyte.

#### 3.3 Catalytic hydrogen production using TFA as acid

Typical Experimental Conditions: 1.0 mmol of Ni-1, Ni-2, Ni-3 or Ni-4 (1.0 mmol of ferrocene was added before and after the reaction) was added into an electrochemical cell and dissolved in 14 mL of a supporting electrolyte solution (0.10 M  $^n\text{Bu}_4\text{PF}_6 / \text{CH}_3\text{CN}$ ). Purity of the electrolyte medium was confirmed over the available electrochemical window through background scans taken prior to addition of analyte. In each trail, Additional of TFA was added and stirred evenly before test.

Turnover frequencies (TOFs) were introduced (determined by eq 1).

$$\frac{i_{cat}}{i_p} = \frac{n}{0.4463} \sqrt{\frac{RT\kappa_{obs}}{Fv}} \quad (eq. 1)$$

In equation 1,  $i_{cat}$  is the catalytic current in presence of acid,  $i_p$  is the peak current for the second reduction wave ( $\text{Ni}^{\text{II/I}}$ ) measured in the absence of acid,  $n$  is the number of electrons involved in the catalytic reaction and we believed a two-electron transfer reaction in this process,  $\kappa_{obs}$  is the observed first-order rate constant,  $R$  is the universal gas constant,  $T$  is the temperature in Kelvin,  $F$  is Faraday's constant,  $v$  is the scan rate, and the 0.4463 is a constant determined by numerical solution of the diffusion equations. The maximum TOF was obtained when the peak current do not increase when adding more TFA.

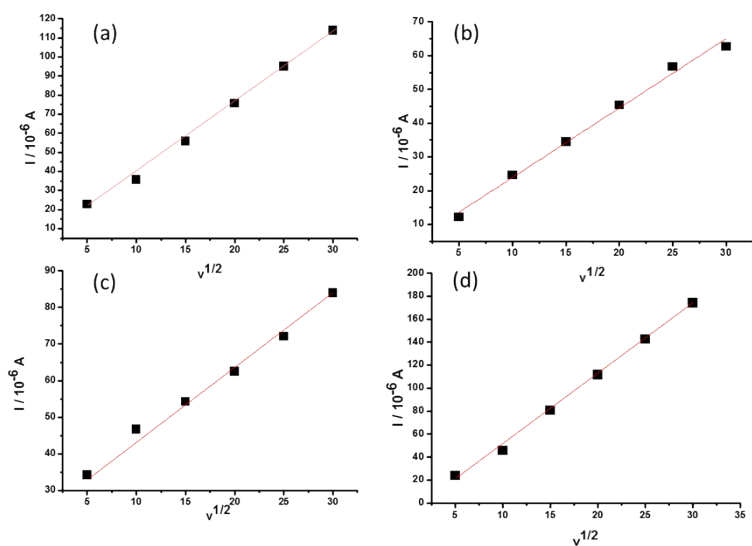

**Fig. S17** Plot of  $i_{cat}$  ( $\mu\text{A}$ ) vs. scan rate $^{1/2}$  ( $\text{V/s}$ ) for 1 mM Ni-1, Ni-2, Ni-3 and Ni-4.

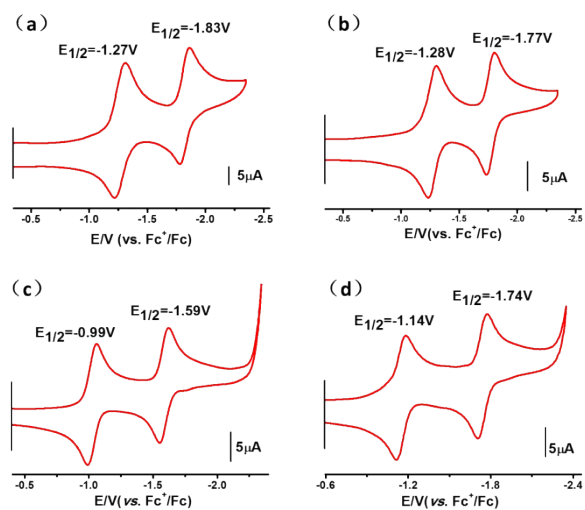

**Fig. S18** Cyclic voltammograms of complexes of Ni-1 (a), Ni-2 (b), Ni-3 (c) and Ni-4 (d).

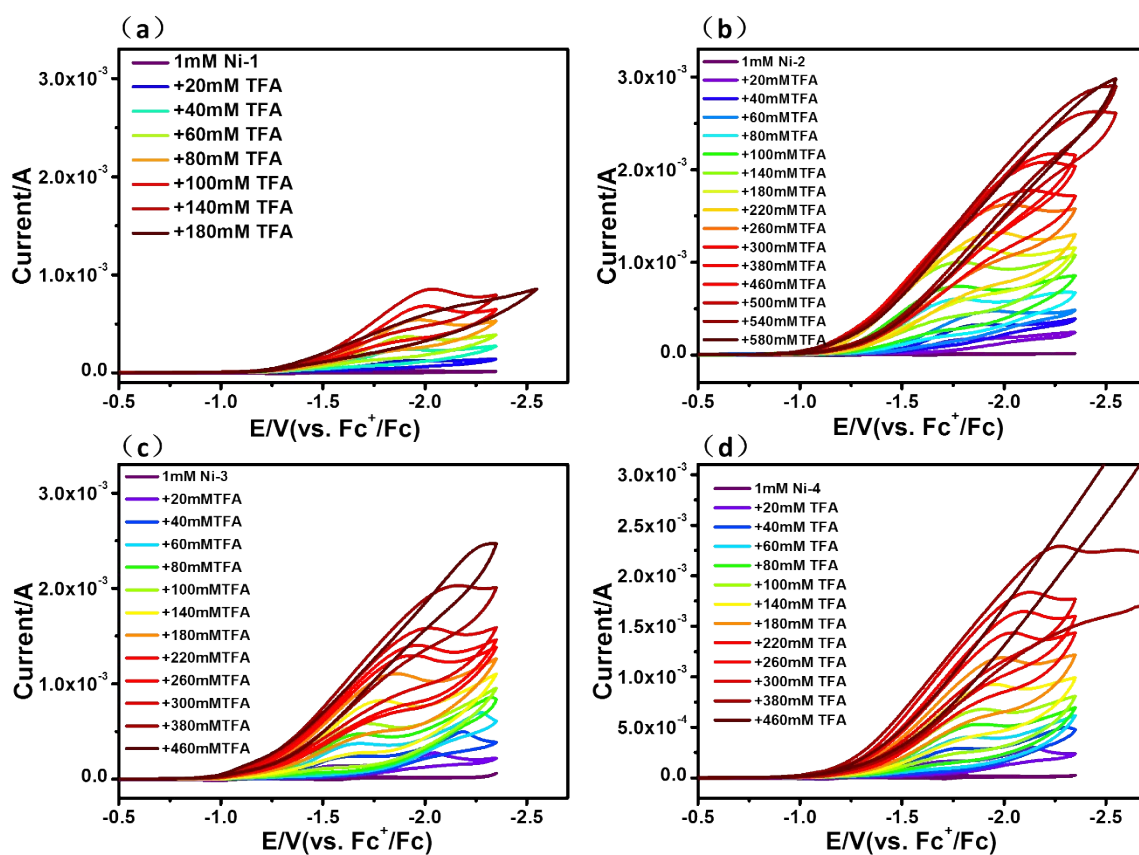

**Fig. S19** Successive cyclic voltammograms of 1.0 mM Ni-1 (a) Ni-2 (b) Ni-3 (c) and Ni-4 (d) in  $\text{CH}_3\text{CN}$  (0.10 M  $n\text{Bu}_4\text{NPF}_6$ ) at increasing concentrations of TFA. Conditions: 3 mm glassy-carbon working electrode; 25 °C; scan rate 100 mV/s.

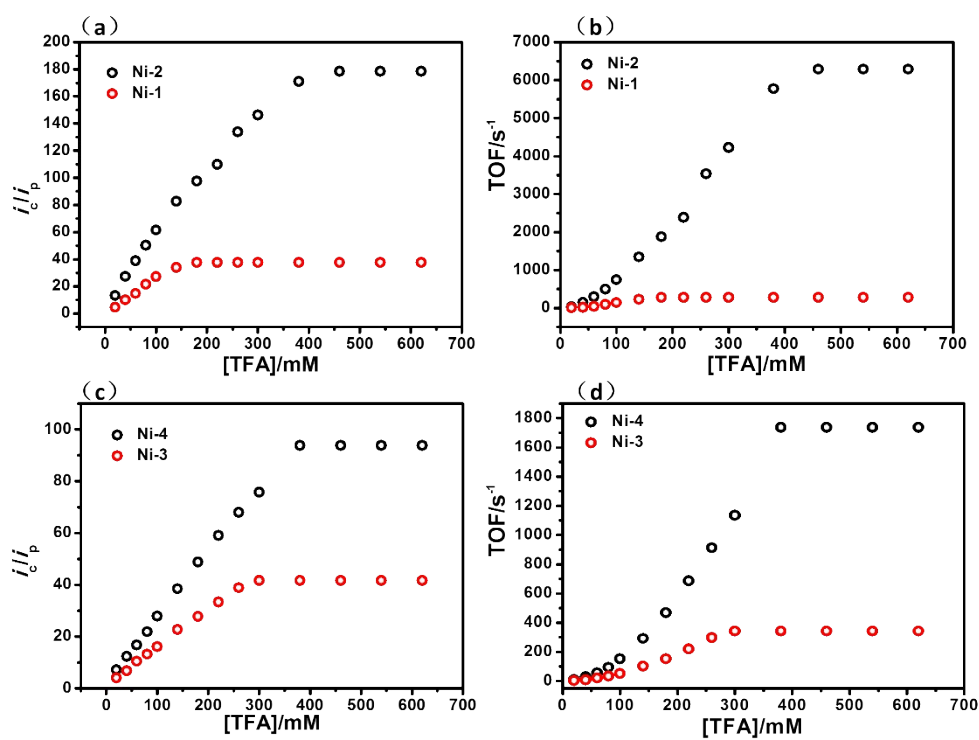

**Fig. S20** Plot of  $i_c/i_p$  vs. concentration of TFA for a typical acid titration of 1.0 mM Ni-1, Ni-2 (a) and Ni-3, Ni-4 (c). Plot of TOF vs. concentration of TFA for a typical acid titration of 1.0 mM Ni-1, Ni-2 (b) and Ni-3, Ni-4 (d).

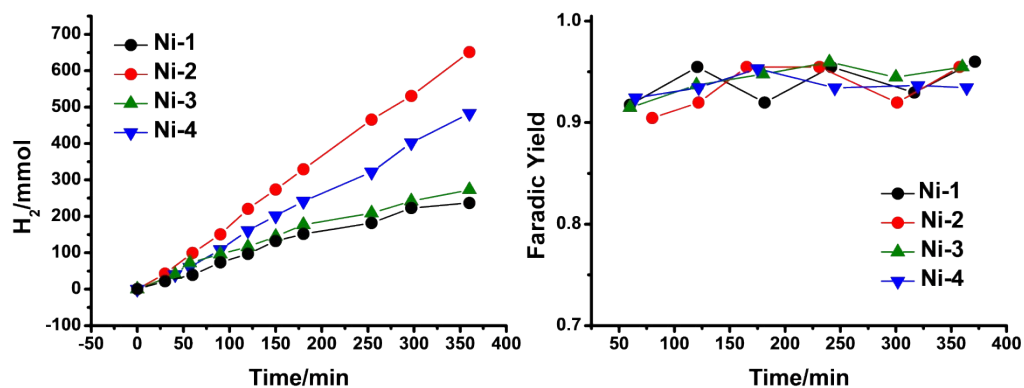

**Fig. S21** (left) Plot of the amount of hydrogen vs. reaction time during the controlled-potential coulometry experiment of 1.0 mM Ni-1 to Ni-4. (right) Faradic yield vs. Reaction time during the controlled-potential coulometry experiment of 1.0 mM Ni-1 to Ni-4. Conditions: GCE plate(1 cm × 1 cm) as working electrode; 25 °C; scan rate 100 mV/s.

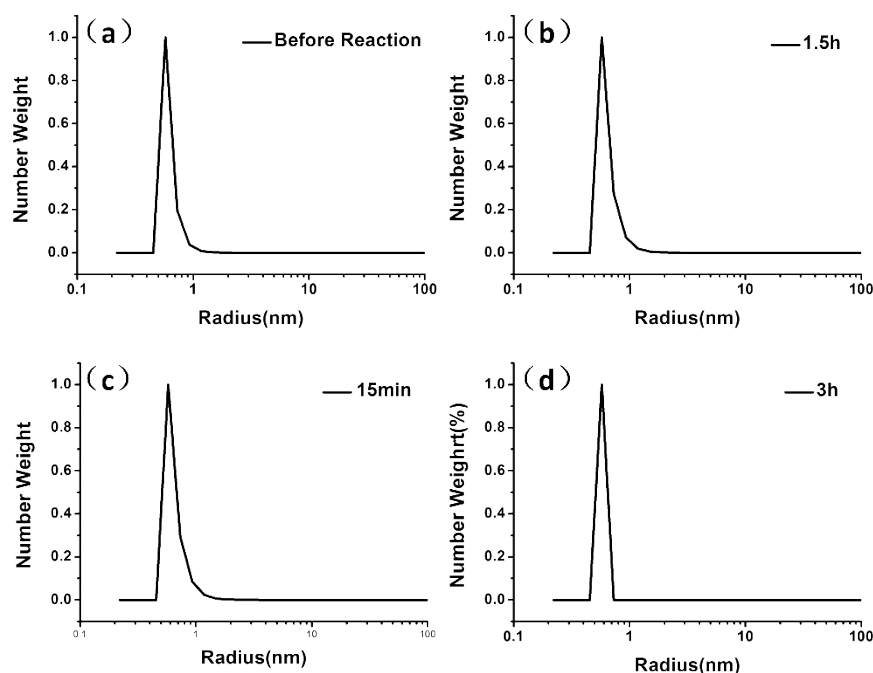

**Fig. S22** Particle distribution determined by DLS experiments during the bulk electrolysis experiments. Electrolysis conditions: 1.0 mM Ni-2 in acetonitrile with 0.1 M  $n\text{Bu}_4\text{NPF}_6$  supporting electrolyte and 100 mM of TFA.

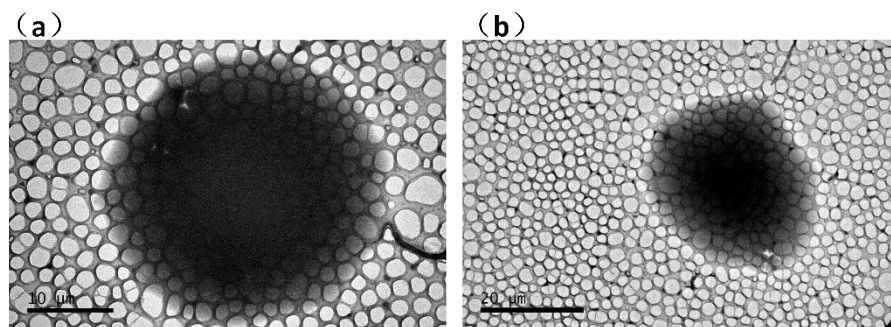

**Fig. S23** TEM experiments before (a) and after (b) the bulk electrolysis experiments. Electrolysis conditions: 1.0 mM Ni-2 in acetonitrile with 0.1 M  $n\text{Bu}_4\text{NPF}_6$  supporting electrolyte and 100 mM of TFA.

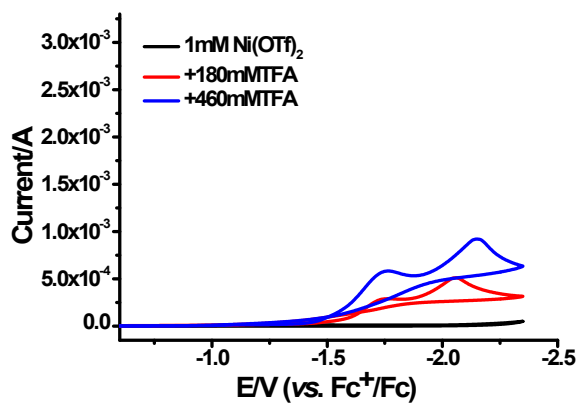

Fig. S24 Successive cyclic voltammograms of 1.0 mM Ni(OTf)<sub>2</sub> in CH<sub>3</sub>CN (0.10 M nBu<sub>4</sub>NPF<sub>6</sub>) at increasing concentrations of TFA. Conditions: 3 mm glassy-carbon working electrode; 25 °C; scan rate 100 mV/s.

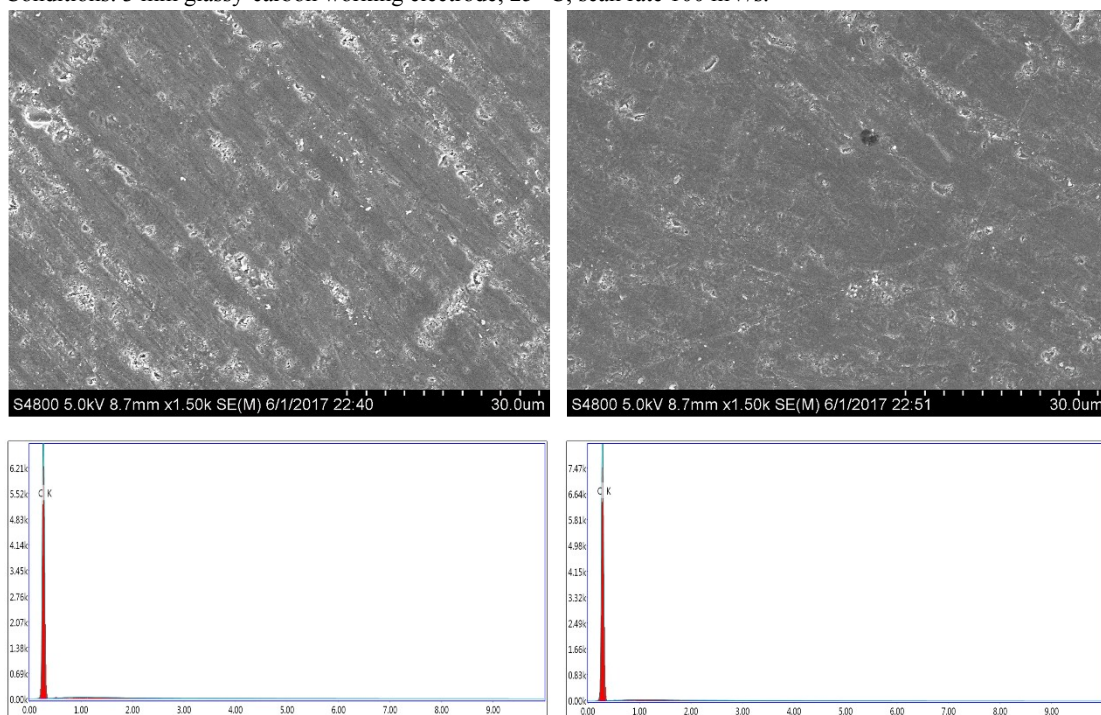

Fig. S25 SEM images and EDX data for GC electrodes before (left) and after (right) the bulk electrolysis experiments. Electrolysis conditions: 1.0 mM Ni-2 in acetonitrile with 0.10 M nBu<sub>4</sub>NPF<sub>6</sub> supporting electrolyte and 100 mM of TFA.

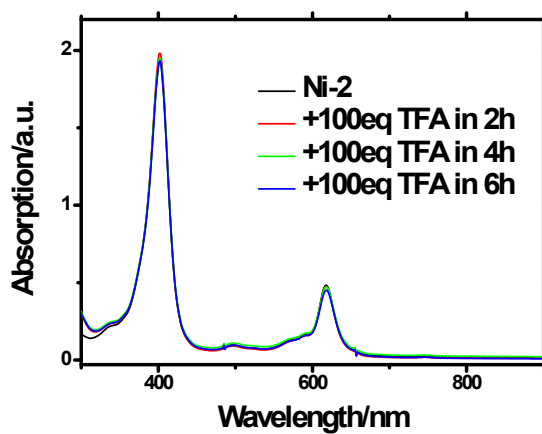

Fig. S26 Stability studies of Ni-2.

**Table S3** Cyclic and differential pulse voltammetry data of Ni-1 to Ni-4

|                                                                      | Ni-1 | Ni-2 | Ni-3 | Ni-4 | Fc <sup>+</sup> /Fc |
|----------------------------------------------------------------------|------|------|------|------|---------------------|
| Cyclic Voltammetry $\Delta E_p$ (mV) of<br>the first reduction wave  | 65   | 59   | 60   | 58   | 57                  |
| Cyclic Voltammetry $\Delta E_p$ (mV) of<br>the second reduction wave | 65   | 59   | 60   | 58   | 57                  |

**Table S4** Experimental results from a typical acid titration of Ni-1

| [Ni-1](mM) | [TFA](mM) | $i_{cat}$ (A)         | $i_p$ (A,corrected)   | $i_{cat}/i_p$ | TOFs( $s^{-1}$ ) |
|------------|-----------|-----------------------|-----------------------|---------------|------------------|
| 1.0        | 20        | $1.21 \times 10^{-4}$ | $2.33 \times 10^{-5}$ | 5             | 5                |
| 1.0        | 40        | $2.42 \times 10^{-4}$ | $2.33 \times 10^{-5}$ | 10            | 21               |
| 1.0        | 60        | $3.71 \times 10^{-4}$ | $2.33 \times 10^{-5}$ | 15            | 50               |
| 1.0        | 80        | $5.01 \times 10^{-4}$ | $2.33 \times 10^{-5}$ | 21            | 91               |
| 1.0        | 100       | $6.11 \times 10^{-4}$ | $2.33 \times 10^{-5}$ | 26            | 135              |
| 1.0        | 140       | $6.82 \times 10^{-4}$ | $2.33 \times 10^{-5}$ | 29            | 168              |
| 1.0        | 180       | $8.56 \times 10^{-4}$ | $2.33 \times 10^{-5}$ | 36            | 265              |

**Table S5** Experimental results from a typical acid titration of Ni-2

| [Ni-2](mM) | [TFA](mM) | $i_{cat}$ (A)         | $i_p$ (A,corrected)   | $i_{cat}/i_p$ | TOFs( $s^{-1}$ ) |
|------------|-----------|-----------------------|-----------------------|---------------|------------------|
| 1.0        | 20        | $2.82 \times 10^{-4}$ | $1.21 \times 10^{-5}$ | 13            | 34               |
| 1.0        | 40        | $4.19 \times 10^{-4}$ | $1.21 \times 10^{-5}$ | 27            | 147              |
| 1.0        | 60        | $5.68 \times 10^{-4}$ | $1.21 \times 10^{-5}$ | 39            | 298              |
| 1.0        | 80        | $6.99 \times 10^{-4}$ | $1.21 \times 10^{-5}$ | 50            | 497              |
| 1.0        | 100       | $8.11 \times 10^{-4}$ | $1.21 \times 10^{-5}$ | 61            | 745              |
| 1.0        | 140       | $1.13 \times 10^{-3}$ | $1.21 \times 10^{-5}$ | 83            | 1348             |
| 1.0        | 180       | $1.18 \times 10^{-3}$ | $1.21 \times 10^{-5}$ | 97            | 2566             |
| 1.0        | 220       | $1.33 \times 10^{-3}$ | $1.21 \times 10^{-5}$ | 109           | 2384             |
| 1.0        | 260       | $1.62 \times 10^{-3}$ | $1.21 \times 10^{-5}$ | 133           | 3537             |
| 1.0        | 300       | $1.77 \times 10^{-3}$ | $1.21 \times 10^{-5}$ | 146           | 4222             |
| 1.0        | 380       | $2.07 \times 10^{-3}$ | $1.21 \times 10^{-5}$ | 171           | 5774             |
| 1.0        | 460       | $2.16 \times 10^{-3}$ | $1.21 \times 10^{-5}$ | 179           | 6287             |
| 1.0        | 540       | $2.16 \times 10^{-3}$ | $1.21 \times 10^{-5}$ | 179           | 6287             |
| 1.0        | 620       | $2.16 \times 10^{-3}$ | $1.21 \times 10^{-5}$ | 179           | 6287             |

**Table S6** Experimental results from a typical acid titration of Ni-3

| [Ni-3](mM) | [TFA](mM) | $i_{cat}$ (A)         | $i_p$ (A,corrected)   | $i_{cat}/i_p$ | TOFs( $s^{-1}$ ) |
|------------|-----------|-----------------------|-----------------------|---------------|------------------|
| 1.0        | 20        | $1.47 \times 10^{-4}$ | $3.60 \times 10^{-5}$ | 4             | 3                |
| 1.0        | 40        | $2.44 \times 10^{-4}$ | $3.60 \times 10^{-5}$ | 7             | 9                |
| 1.0        | 60        | $3.77 \times 10^{-4}$ | $3.60 \times 10^{-5}$ | 10            | 22               |
| 1.0        | 80        | $4.75 \times 10^{-4}$ | $3.60 \times 10^{-5}$ | 13            | 34               |
| 1.0        | 100       | $5.85 \times 10^{-4}$ | $3.60 \times 10^{-5}$ | 16            | 51               |
| 1.0        | 140       | $8.19 \times 10^{-4}$ | $3.60 \times 10^{-5}$ | 23            | 102              |
| 1.0        | 180       | $1.00 \times 10^{-3}$ | $3.60 \times 10^{-5}$ | 28            | 152              |
| 1.0        | 220       | $1.20 \times 10^{-3}$ | $3.60 \times 10^{-5}$ | 33            | 219              |
| 1.0        | 260       | $1.40 \times 10^{-3}$ | $3.60 \times 10^{-5}$ | 38            | 298              |
| 1.0        | 300       | $1.50 \times 10^{-3}$ | $3.60 \times 10^{-5}$ | 42            | 342              |
| 1.0        | 380       | $1.50 \times 10^{-3}$ | $3.60 \times 10^{-5}$ | 42            | 342              |
| 1.0        | 460       | $1.50 \times 10^{-3}$ | $3.60 \times 10^{-5}$ | 42            | 342              |
| 1.0        | 540       | $1.50 \times 10^{-3}$ | $3.60 \times 10^{-5}$ | 42            | 342              |
| 1.0        | 620       | $1.50 \times 10^{-3}$ | $3.60 \times 10^{-5}$ | 42            | 342              |

**Table S7** Experimental results from a typical acid titration of Ni-4

| [Ni-4](mM) | [TFA](mM) | $i_{cat}$ (A)         | $i_p$ (A,corrected)   | $i_{cat}/i_p$ | TOFs( $s^{-1}$ ) |
|------------|-----------|-----------------------|-----------------------|---------------|------------------|
| 1.0        | 20        | $1.76 \times 10^{-4}$ | $2.44 \times 10^{-5}$ | 7             | 10               |
| 1.0        | 40        | $3.01 \times 10^{-4}$ | $2.44 \times 10^{-5}$ | 12            | 30               |
| 1.0        | 60        | $4.10 \times 10^{-4}$ | $2.44 \times 10^{-5}$ | 16            | 56               |
| 1.0        | 80        | $5.35 \times 10^{-4}$ | $2.44 \times 10^{-5}$ | 21            | 95               |
| 1.0        | 100       | $6.82 \times 10^{-4}$ | $2.44 \times 10^{-5}$ | 27            | 154              |
| 1.0        | 140       | $9.40 \times 10^{-4}$ | $2.44 \times 10^{-5}$ | 38            | 293              |
| 1.0        | 180       | $1.19 \times 10^{-3}$ | $2.44 \times 10^{-5}$ | 48            | 469              |
| 1.0        | 220       | $1.44 \times 10^{-3}$ | $2.44 \times 10^{-5}$ | 59            | 687              |
| 1.0        | 260       | $1.66 \times 10^{-3}$ | $2.44 \times 10^{-5}$ | 68            | 913              |
| 1.0        | 300       | $1.85 \times 10^{-3}$ | $2.44 \times 10^{-5}$ | 75            | 1134             |
| 1.0        | 380       | $2.29 \times 10^{-3}$ | $2.44 \times 10^{-5}$ | 94            | 1737             |



|     |     |                       |                       |    |      |
|-----|-----|-----------------------|-----------------------|----|------|
| 1.0 | 460 | $2.29 \times 10^{-3}$ | $2.44 \times 10^{-5}$ | 94 | 1737 |
| 1.0 | 540 | $2.29 \times 10^{-3}$ | $2.44 \times 10^{-5}$ | 94 | 1737 |
| 1.0 | 620 | $2.29 \times 10^{-3}$ | $2.44 \times 10^{-5}$ | 94 | 1737 |

FOWA begins with eq. 2, which describes a catalytic response current for a typical EECC reaction. For normalization of eq. 2 by  $i_p$ , the peak current in the absence of a substrate, as defined by eq. 3, yields eq. 4.

$$i = \frac{nFAC_p^0 \sqrt{Dn'k_{obs}}}{1 + \exp\left[\frac{nF}{RT}(E - E_{redox})\right]} \quad (\text{eq. 2})$$

$$i_p = 0.1463nFAC_p^0 \left(\frac{nFvD}{RT}\right)^{1/2} \quad (\text{eq. 3})$$

$$\frac{i}{i_p} = \frac{2.24 \sqrt{\frac{RT}{nFv}} \sqrt{n'k_{obs}}}{1 + \exp\left[\frac{nF}{RT}(E - E_{redox})\right]} \quad (\text{eq. 4})$$

Figure S27(a) presents data in the format of  $i/i_p$  versus  $E - E_{redox}$ , where the  $E_{cat/2} = E_{redox}$ . The influence of substrate consumption caused the response current to deviate from an ideal S shape. In figure S27(b), we observed a deviation from the predicted linear relationship according to eq. 4, but at the foot of the wave, the plot holds to the linear expectation. Thus, a linear extrapolation can be performed to retrieve the expected linear relationship. From eq. 4,  $k_{obs}$  can be determined from the slope of the foot of the wave (eq. 5). In eq. 5,  $m$  is slope of the tangent line,  $n$  is the number of unique electron-transfer processes that occur at the electrode per catalyst and  $n'$  is the catalyst equivalents used per turnover.  $R$  is the universal gas constant,  $T$  is the temperature in Kelvin,  $F$  is Faraday's constant,  $v$  is the scan rate.

$$m = 2.24 \sqrt{\frac{RT}{nFv}} \sqrt{n'k_{obs}} \quad (\text{eq. 5})$$

In the presence of 100 mM TFA, we can get a slope of 16, 43, 23 and 36 for Ni-1 to Ni-4 respectively from Fig. S25b. Thus we can get the  $k_{obs}$  of 384, 2773.5, 793.5, 1944 for Ni-1 to Ni-4 respectively by eq. 5. Compared to  $k_{obs}$  of 135, 745, 51, 154 for Ni-1 to Ni-4 calculated by eq. 1 in this work, the  $k_{obs}$  calculated from the FOWA is larger. However, the results from the two calculation methods show the same trend that the  $\beta$ -hydrogenation of the pyrrole ring enhance the reactivities of nickel porphyrinoids with the  $k_{obs}$  of Ni-2 > Ni-1, and Ni-4 > Ni-3.

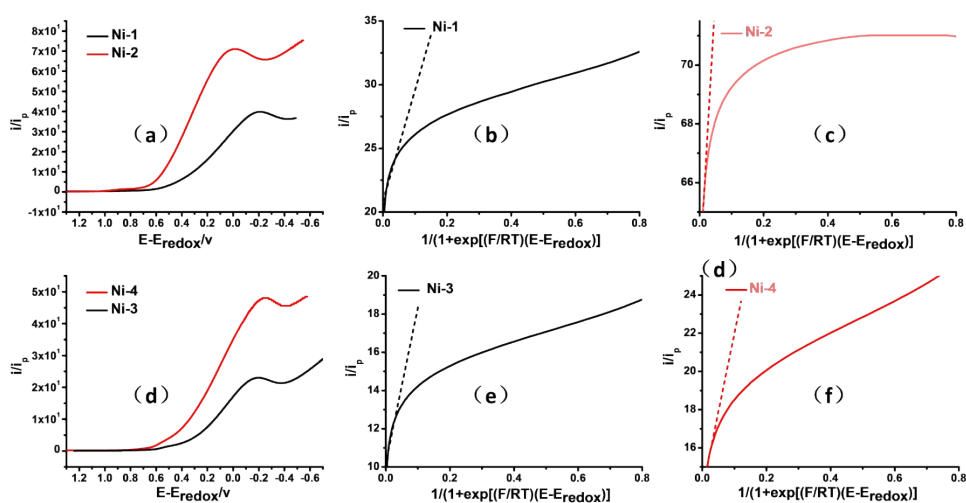

**Fig. S27** Segment of the cyclic voltammogram of Ni-1, Ni-2 (a) and Ni-3, Ni-4 (b) with TFA. Conditions: MeCN, 0.1 M  $n\text{Bu}_4\text{NPF}_6$ , 0.1  $\text{Vs}^{-1}$ ,  $[\text{Ni-P}] = 1 \text{ mM}$ ,  $[\text{TFA}] = 100 \text{ mM}$ . FOWA plot for the same CV responses showing the linear fits obtained for Ni-1(b), Ni-2(c), Ni-3(e) and Ni-4(f).

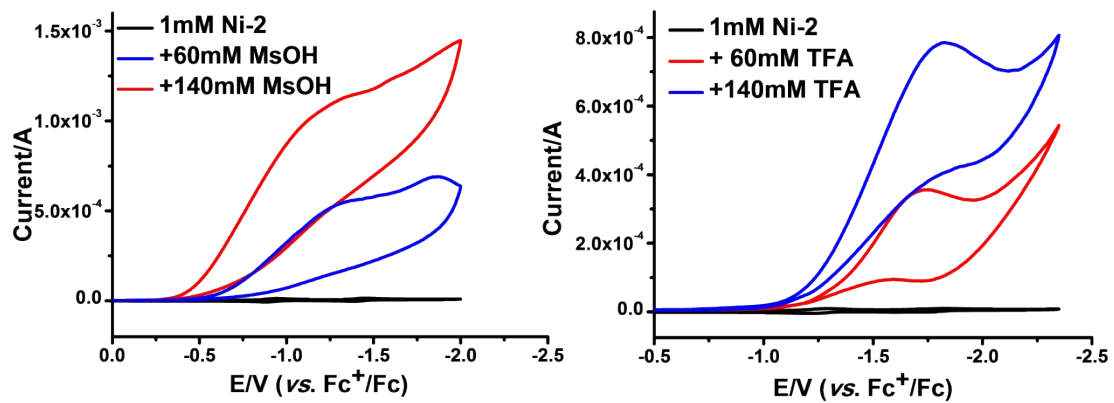

**Fig. S28** Successive cyclic voltammograms of 1.0 mM Ni-2 in CH<sub>3</sub>CN (0.10 M <sup>n</sup>Bu<sub>4</sub>NPF<sub>6</sub>) at increasing concentrations of TFA. Conditions: 3 mm glassy-carbon working electrode; 25 °C; scan rate 100 mV/s.

#### 4. Chemistry titration.

Typical Experimental Conditions: Acetonitrile solutions of Ni-1 or Ni-2 ( $1.6 \times 10^{-5}$  M) and  $\text{Co}(\text{Cp}^*)_2$  ( $9.3 \times 10^{-4}$  M) were prepared in the glove box and stored in airtight cuvettes and vial respectively. The solution of Ni-1 or Ni-2 and 25  $\mu\text{L}$   $\text{Co}(\text{Cp}^*)_2$  were mixed and the UV-vis spectra were recorded immediately after the mixing.

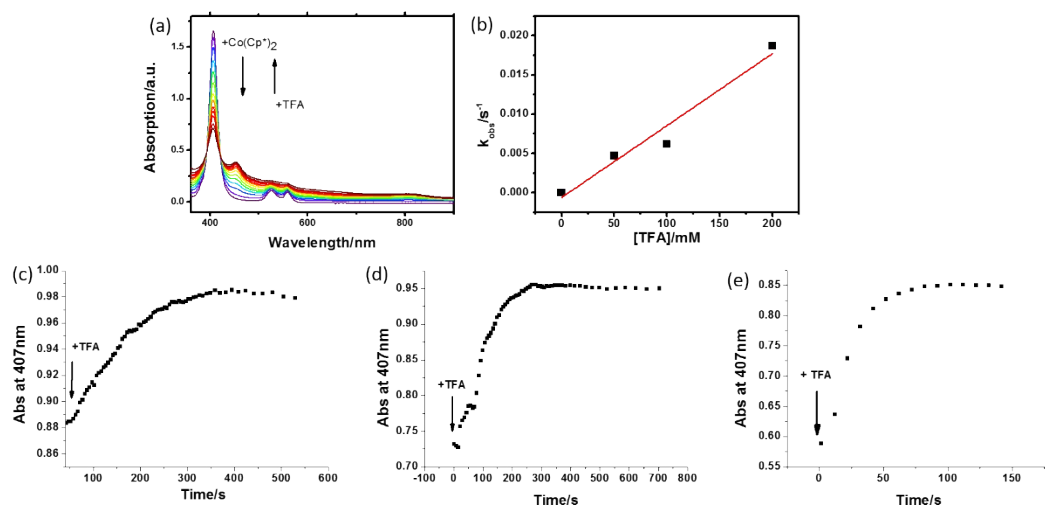

**Fig. S29** (a) UV-vis spectral changes due to the reaction of Ni-1 with excessive amount of  $\text{Co}(\text{Cp}^*)_2$  to generate  $[\text{Ni-1}]^{2-}$  and the subsequent reaction with TFA in deaerated  $\text{CH}_3\text{CN}$  ( $[\text{Ni-1}] = 1.6 \times 10^{-5}$  M;  $[\text{Co}(\text{Cp}^*)_2] = 1.6 \times 10^{-5}$  M;  $T = 10$  °C). Time profiles of absorbance at 407 nm band due to the reaction of  $[\text{Ni-1}]^{2-}$  with various amounts of TFA: (c)  $8.0 \times 10^{-4}$  M (50eq), (d)  $1.6 \times 10^{-3}$  M (100eq), (e)  $3.2 \times 10^{-3}$  M (200eq).  $k_{\text{obs}}$  obtained by First-order plots of the reaction of  $[\text{Ni-1}]^{2-}$  with various amounts of TFA are summarized as plot of  $k_{\text{obs}}$  vs. the concentration of TFA (b).

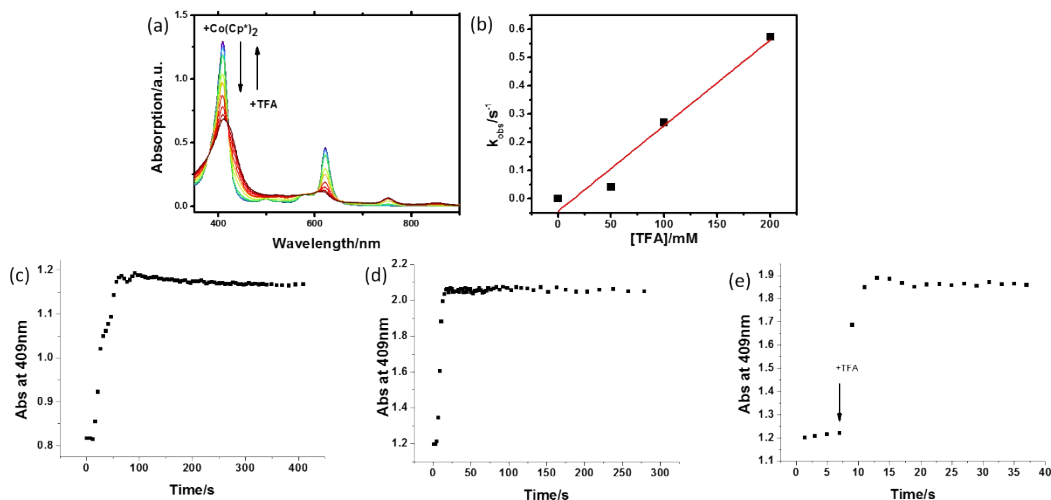

**Fig. S30** (a) UV-vis spectral changes due to the reaction of Ni-2 with excessive amount of  $\text{Co}(\text{Cp}^*)_2$  to generate  $[\text{Ni-2}]^{2-}$  and the subsequent reaction with TFA in deaerated  $\text{CH}_3\text{CN}$  ( $[\text{Ni-2}] = 1.6 \times 10^{-5}$  M;  $[\text{Co}(\text{Cp}^*)_2] = 1.6 \times 10^{-5}$  M;  $T = 10$  °C). Time profiles of absorbance at 409 nm band due to the reaction of  $[\text{Ni-2}]^{2-}$  with various amounts of TFA: (c)  $8.0 \times 10^{-4}$  M (50eq), (d)  $1.6 \times 10^{-3}$  M (100eq), (e)  $3.2 \times 10^{-3}$  M (200eq).  $k_{\text{obs}}$  obtained by first-order plots of the reaction of  $[\text{Ni-2}]^{2-}$  with various amounts of TFA are summarized as plot of  $k_{\text{obs}}$  vs. the concentration of TFA (b).

## 5. Computational details

### 5.1. General

All geometry optimizations calculations were performed using the density functional theory (DFT) functional B3LYP/6-31+G(d) as basis set and LAN2DZ as pseudopotential as implemented in the Gaussian 09 software.<sup>[2]</sup> Solvent effect was considered in all geometry optimizations and property calculations using the conductor-like polarizable continuum model (CPCM). The energies were corrected by single point calculations using B3LYP/6-31+G(d,p) as basis set. The frequency calculations at the same level were carried out to confirm each stationary point to be either a minimum or transition state. Intrinsic reaction coordinate (IRC) paths were calculated to connect each TS to corresponding reactant and product.<sup>[3]</sup>

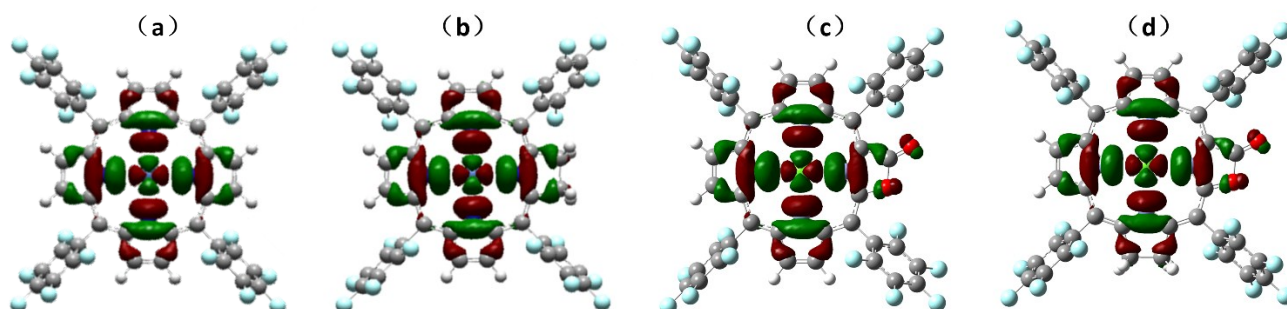

Fig. S31 Calculated SOMO of [Ni-1]<sup>-</sup> (a), [Ni-2]<sup>-</sup> (b), [Ni-3]<sup>-</sup> (c), [Ni-4]<sup>-</sup> (d) showing electron density localized on the nickel center.

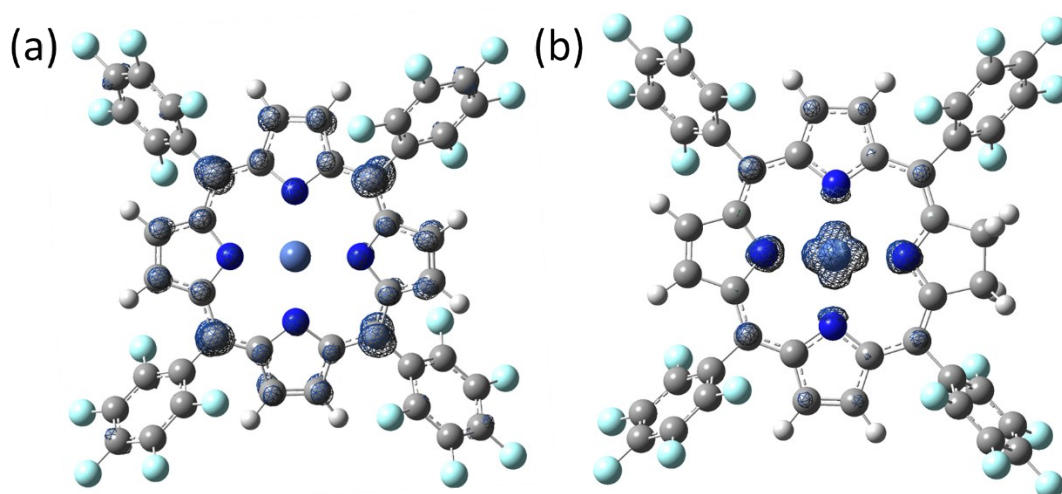

Fig. S32 Computed Mulliken atomic spin density (B3LYP with geometry optimized in solution, IsoValue: 0.005) plots of [Ni-1]<sup>2-</sup> (a) and [Ni-2]<sup>2-</sup> (b).

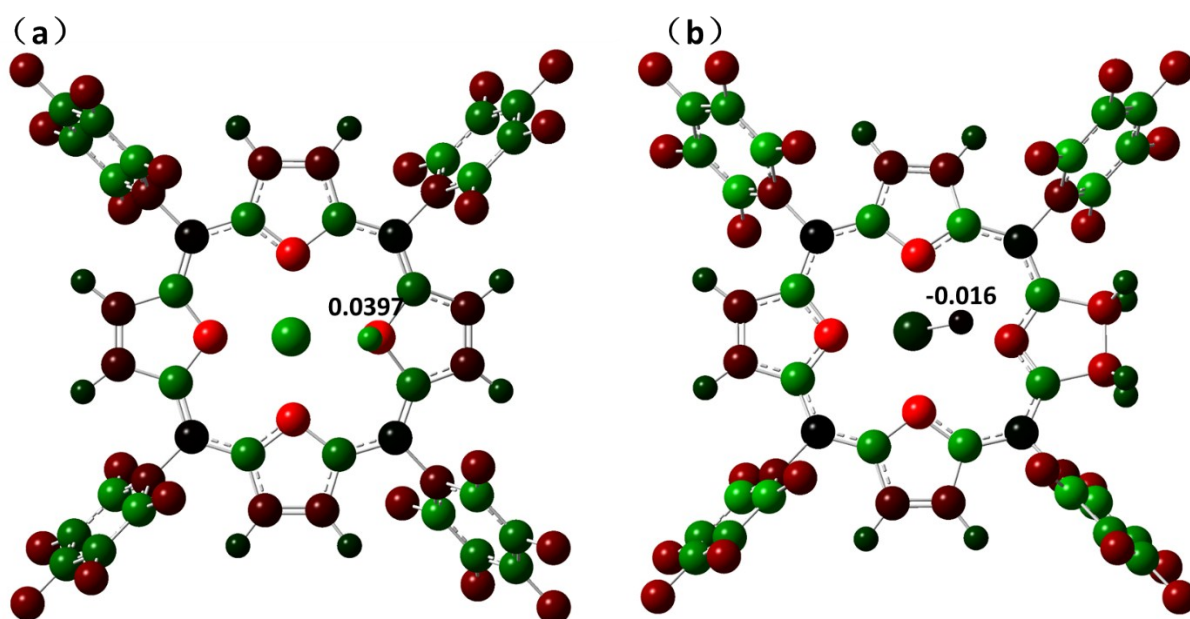

**Fig. S33** Computed Mulliken charge distribution plots of [Ni-1-H]<sup>2-</sup> (a) and [H-Ni-2]<sup>2-</sup> (b).

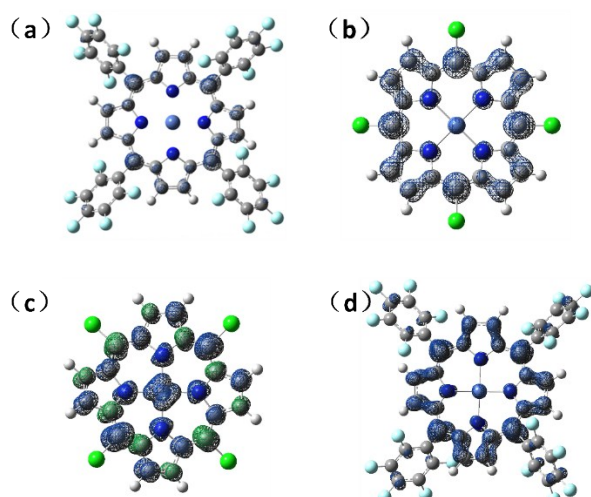

**Fig. S34** Computed Mulliken atomic spin density (geometry optimized in solution, IsoValue: 0.005 for (a) and 0.03 for (b), (c) and (d)) plots of [Ni-1]<sup>2-</sup>. The computed spin density is found to be almost entirely on the ligand for (a), (b) and (d) (SD on Ni=0.0026, 0.0021 and 0.0048 for (a), (b) and (d) respectively). Computational Details: Optimizations were performed with B3LYP as functional, 6-31+G(d) as basis set and LAN2DZ as pseudopotential for (a) and (b). Optimizations were performed with B3P86 as functional and the 6-31+G(d,p) as basis set for (c) and (d). Chlorine atoms to truncate pentafluorophenyl meso-substituents of the porphyrin ring for (b) and (c).

**Table S8.** Calculated Mulliken atomic spin densities of [Ni-1]<sup>2-</sup>

| Functional           | B3LYP | B3P86  | BLYP  | BP86  | M06L  |
|----------------------|-------|--------|-------|-------|-------|
| [Ni-1] <sup>2-</sup> | 0.017 | 0.0032 | 0.032 | 0.037 | 0.020 |

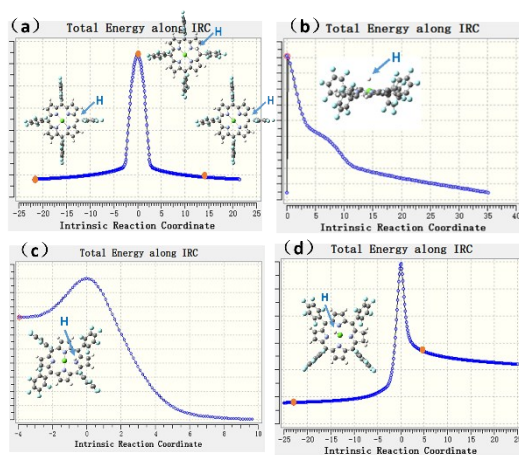

**Fig. S35** IRC path for the transition state of H-atom added to the meso-carbon (a), nickel center (b) and the pyrrolic nitrogen (c) for Ni-1. IRC path for the transition state of H-atom added to nickel center (d) for Ni-2.

**Table S9** Mulliken atomic spin densities of triplet  $[\text{Ni-1}]^2-$

Mulliken atomic spin densities:1

|    |   |           |
|----|---|-----------|
| 1  | C | 0.165520  |
| 2  | C | 0.165477  |
| 3  | C | 0.046756  |
| 4  | C | 0.046546  |
| 5  | N | 0.039237  |
| 6  | N | 0.039234  |
| 7  | C | 0.043133  |
| 8  | C | 0.043111  |
| 9  | C | 0.165659  |
| 10 | C | 0.165352  |
| 11 | C | 0.046606  |
| 12 | C | 0.046689  |
| 13 | C | 0.043154  |
| 14 | C | 0.043099  |
| 15 | C | 0.000577  |
| 16 | C | 0.000540  |
| 17 | C | 0.027394  |
| 18 | C | 0.022753  |
| 19 | C | -0.011412 |
| 20 | C | -0.007924 |
| 21 | C | 0.042178  |
| 22 | C | 0.042019  |
| 23 | C | -0.007926 |
| 24 | C | -0.011323 |
| 25 | C | 0.022775  |
| 26 | C | 0.027248  |
| 27 | C | 0.000570  |
| 28 | C | 0.000544  |
| 29 | C | 0.027395  |
| 30 | C | 0.022703  |
| 31 | C | -0.011410 |
| 32 | C | -0.007892 |
| 33 | C | 0.042218  |
| 34 | C | 0.041969  |
| 35 | C | -0.007957 |
| 36 | C | -0.011320 |
| 37 | C | 0.022822  |
| 38 | C | 0.027239  |
| 39 | F | 0.000904  |
| 40 | F | 0.000803  |
| 41 | F | 0.000805  |
| 42 | F | 0.000899  |
| 43 | F | -0.000395 |
| 44 | F | -0.000237 |
| 45 | F | 0.002097  |
| 46 | F | 0.002089  |
| 47 | F | -0.000237 |
| 48 | F | -0.000390 |

49 F 0.000804  
 50 F 0.000899  
 51 F 0.000904  
 52 F 0.000801  
 53 F -0.000394  
 54 F -0.000235  
 55 F 0.002099  
 56 F 0.002087  
 57 F -0.000239  
 58 F -0.000390  
 59 N 0.039285  
 60 N 0.039183  
 61 C 0.070802  
 62 C 0.065404  
 63 H -0.003855  
 64 H -0.004104  
 65 C 0.070944  
 66 C 0.065343  
 67 H -0.004110  
 68 H -0.003853  
 69 Ni 0.002623  
 70 C 0.070868  
 71 C 0.065282  
 72 C 0.070730  
 73 C 0.065336  
 74 H -0.003850  
 75 H -0.004101  
 76 H -0.003849  
 77 H -0.004106

Sum of Mulliken atomic spin densities = 2.00000

**Table S10** Mulliken atomic spin densities of triplet [Ni-2]<sup>2-</sup>  
Mulliken atomic spin densities:

1  
 1 C 0.074918  
 2 C 0.051145  
 3 C -0.043439  
 4 C -0.037727  
 5 N 0.036239  
 6 N 0.037375  
 7 C -0.042013  
 8 C -0.039743  
 9 C 0.071546  
 10 C 0.054375  
 11 C 0.022346  
 12 C 0.032131  
 13 C 0.032119  
 14 C 0.020905  
 15 C -0.000336  
 16 C 0.000391  
 17 C 0.004082  
 18 C 0.010928  
 19 C -0.000175  
 20 C -0.003869  
 21 C 0.014392  
 22 C 0.009040  
 23 C -0.005410  
 24 C 0.002118  
 25 C 0.013550  
 26 C 0.001024  
 27 C 0.000109  
 28 C 0.001158  
 29 C 0.013507  
 30 C 0.002897  
 31 C -0.005427  
 32 C 0.001195  
 33 C 0.014288  
 34 C 0.014093  
 35 C 0.000016  
 36 C -0.005726

37 C 0.003745  
38 C 0.013727  
39 F -0.000024  
40 F 0.000510  
41 F -0.000030  
42 F 0.000629  
43 F 0.000006  
44 F -0.000084  
45 F 0.000696  
46 F 0.000435  
47 F -0.000141  
48 F 0.000096  
49 F 0.000613  
50 F -0.000039  
51 F 0.000623  
52 F -0.000011  
53 F -0.000147  
54 F 0.000071  
55 F 0.000689  
56 F 0.000679  
57 F 0.000014  
58 F -0.000205  
59 N 0.109593  
60 N 0.126573  
61 C 0.041773  
62 C 0.051247  
63 H -0.002054  
64 H -0.001623  
65 C -0.008401  
66 C -0.007138  
67 H 0.001447  
68 H 0.001369  
69 Ni 1.218029  
70 C 0.052464  
71 C 0.040978  
72 C 0.005881  
73 C 0.005449  
74 H -0.001864  
75 H -0.001151  
76 H -0.001587  
77 H -0.002145  
78 H -0.001908  
79 H -0.000809

Sum of Mulliken atomic spin densities = 2.00000

**Table S11** Mulliken atomic spin densities of triplet [Ni-3]<sup>2-</sup>  
Mulliken atomic spin densities: 1

1 C -0.062735  
2 C -0.108728  
3 C 0.271139  
4 C 0.268664  
5 N -0.620713  
6 N -0.635201  
7 C -0.156721  
8 C -0.131128  
9 C 0.252454  
10 C 0.246197  
11 C -0.022747  
12 C -0.030656  
13 C 0.168533  
14 C 0.262029  
15 C 0.517091  
16 C 0.282303



17 C -0.188204  
18 C -0.141870  
19 C 0.332207  
20 C 0.320379  
21 C 0.271092  
22 C 0.268620  
23 C 0.280313  
24 C 0.275013  
25 C 0.272558  
26 C 0.268099  
27 C 0.325196  
28 C 0.330164  
29 C -0.191290  
30 C -0.206002  
31 C 0.362295  
32 C 0.339184  
33 C 0.271870  
34 C 0.275073  
35 C 0.288584  
36 C 0.287865  
37 C 0.274724  
38 C 0.273658  
39 C 0.344130  
40 C 0.345212  
41 F -0.306076  
42 F -0.305889  
43 F -0.300735  
44 F -0.301372  
45 F -0.304324  
46 F -0.306376  
47 F -0.300208  
48 F -0.302498  
49 F -0.304229  
50 F -0.306502  
51 F -0.305412  
52 F -0.308547  
53 F -0.301687  
54 F -0.301240  
55 F -0.301751  
56 F -0.301383  
57 F -0.297213  
58 F -0.297142  
59 F -0.301311  
60 F -0.301575  
63 N -0.604280  
64 N -0.605716  
65 C -0.108016  
66 C -0.130083  
69 C -0.051515  
70 C -0.072699

73 Ni 0.356712  
74 C 0.493260  
75 O -0.501559  
76 O -0.499285

Sum of Mulliken atomic spin densities = 2.00000

**Table S12** Mulliken atomic spin densities of triplet [Ni-4]<sup>2-</sup>  
Mulliken atomic spin densities: 1

1 C 0.073495  
2 C 0.018154  
3 C 0.085184  
4 C 0.073195  
5 N 0.113414  
6 N 0.165968  
7 C 0.043737  
8 C 0.092067  
9 C 0.004950  
10 C 0.010518  
11 C 0.073343  
12 C 0.202410  
13 C -0.043283  
14 C -0.076899  
15 C 0.008097  
16 C -0.022786  
17 C -0.006750  
18 C -0.001014  
19 C 0.003569  
20 C -0.000211  
21 C -0.001712  
22 C 0.001026  
23 C 0.005032  
24 C 0.000245  
25 C -0.002146  
26 C 0.000268  
27 C 0.007505  
28 C 0.001754  
29 C -0.004749  
30 C -0.014811  
31 C 0.006588  
32 C 0.012677  
33 C -0.002352  
34 C -0.004175  
35 C 0.005236  
36 C 0.008847  
37 C -0.001793  
38 C -0.002605  
39 C 0.004356  
40 C 0.007742  
41 F -0.000005  
42 F 0.000098  
43 F 0.000054

44 F -0.000005  
45 F -0.000030  
46 F 0.000060  
47 F 0.000319  
48 F 0.000017  
49 F -0.000037  
50 F 0.000060  
51 F 0.000406  
52 F 0.000129  
53 F 0.000254  
54 F 0.000355  
55 F -0.000037  
56 F -0.000044  
57 F 0.000342  
58 F 0.000575  
59 F -0.000037  
60 F -0.000011  
61 H -0.002033  
62 H -0.004034  
63 N 0.036685  
64 N 0.039957  
65 C 0.070876  
66 C 0.012418  
67 C -0.031411  
68 H 0.000507  
69 H 0.002405  
70 Ni 0.949478  
71 C 0.001432  
72 H -0.000176  
73 H 0.000285  
74 C 0.005691  
75 H -0.001754  
76 H -0.001177  
77 O 0.082737  
78 O -0.008441

Sum of Mulliken atomic spin densities = 2.0000

## 5.2. Energy plot

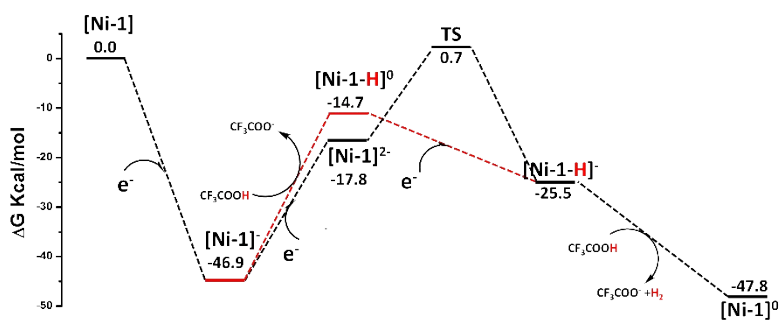

**Fig. S36** Energy diagram for HER catalyzed by Ni-1. Free-energy values are given in kcal/mol.

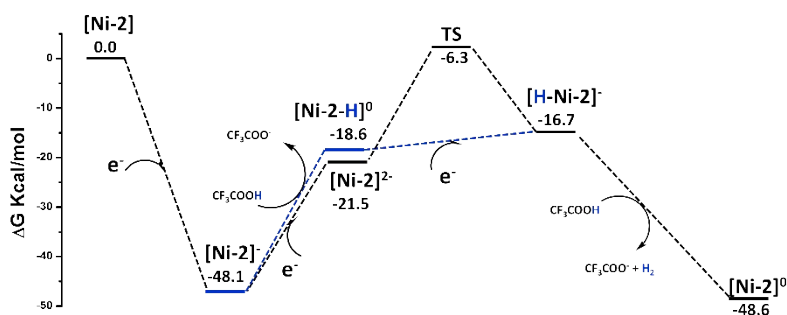

**Fig. S37** Energy diagram for HER catalyzed by Ni-2. Free-energy values are given in kcal/mol.

The energies of hydrogen evolution are calculated by a thermodynamic cycle as follow.

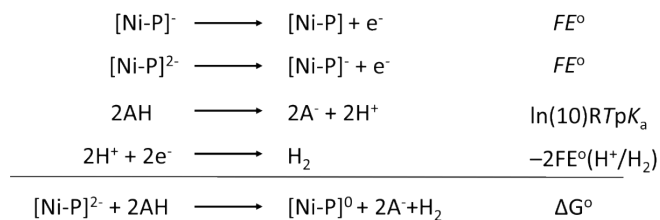

**Scheme S1.** Thermodynamic analysis of HER.  $E^\circ(\text{H}^+/\text{H}_2)$  is the experimental potential for the normal hydrogen electrode in acetonitrile, determined to be -0.14 V vs.  $\text{Fc}^+/\text{Fc}$ . The  $pK_a$  was the experimental value of TFA ( $pK_a = 12.7$ ).

### 5.3. Cartesian Coordinates for Key Species

#### Ni-1

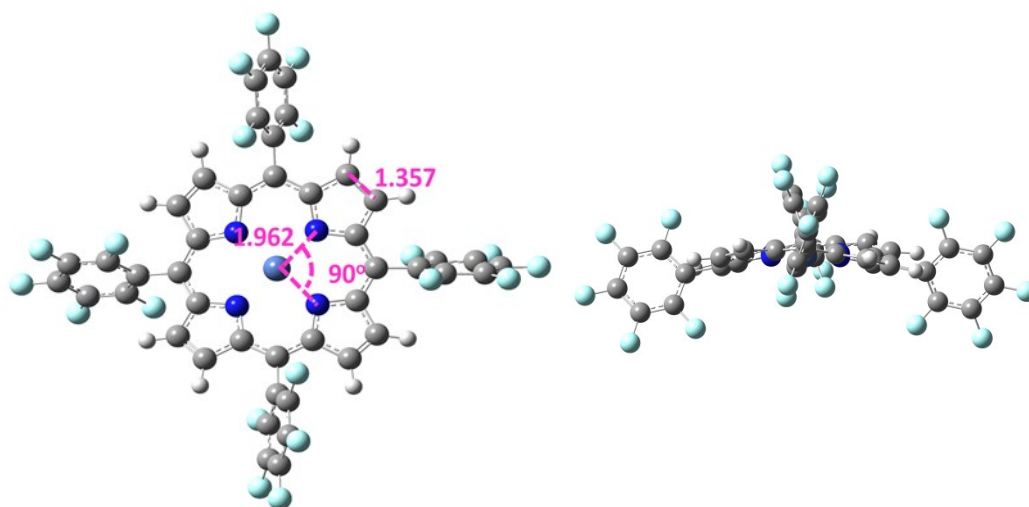

Charge = 0 Multiplicity = 1

|   |          |          |          |
|---|----------|----------|----------|
| C | -3.0806  | 1.25475  | -0.3579  |
| C | 3.33011  | -0.87534 | -0.32652 |
| C | -2.85549 | -0.09859 | -0.11005 |
| C | 3.10449  | 0.48342  | -0.11118 |
| N | 1.00167  | -1.55776 | 0.08768  |
| N | -0.75296 | 1.94647  | 0.04492  |
| C | -1.89661 | -2.0021  | 0.39483  |
| C | 2.14465  | 2.39792  | 0.34818  |
| C | -0.94133 | -3.00582 | 0.53802  |
| C | 1.18902  | 3.40456  | 0.46652  |
| C | 0.41513  | -2.78309 | 0.30564  |
| C | -0.16684 | 3.17651  | 0.23584  |
| C | 2.3248   | -1.82928 | -0.18533 |
| C | -2.07541 | 2.21163  | -0.2375  |
| C | -4.4704  | 1.69447  | -0.68102 |
| C | 4.72045  | -1.32262 | -0.63668 |
| C | -5.27547 | 2.36208  | 0.24797  |
| C | 5.27886  | -1.09674 | -1.89958 |
| C | -6.57359 | 2.76529  | -0.05729 |
| C | 6.57593  | -1.49537 | -2.21508 |
| C | -7.09868 | 2.4946   | -1.31924 |
| C | 7.34918  | -2.13929 | -1.25158 |
| C | -6.32408 | 1.82697  | -2.26538 |
| C | 6.82261  | -2.37786 | 0.01624  |
| C | -5.02726 | 1.43681  | -1.93851 |
| C | 5.52424  | -1.96684 | 0.30977  |
| C | -1.38538 | -4.39237 | 0.86911  |
| C | 1.63205  | 4.79807  | 0.76837  |
| C | -2.0405  | -5.2065  | -0.06089 |
| C | 1.38827  | 5.36943  | 2.02214  |
| C | -2.4481  | -6.50153 | 0.25159  |
| C | 1.78205  | 6.66984  | 2.32981  |
| C | -2.19477 | -7.01416 | 1.52224  |
| C | 2.43928  | 7.43337  | 1.36753  |
| C | -1.5398  | -6.23038 | 2.46965  |
| C | 2.69601  | 6.89375  | 0.10879  |
| C | -1.14492 | -4.93687 | 2.13538  |
| C | 2.28943  | 5.59227  | -0.17711 |
| F | -4.80305 | 2.63222  | 1.47213  |

|    |          |          |          |
|----|----------|----------|----------|
| F  | 4.56003  | -0.48249 | -2.84736 |
| F  | -0.51978 | -4.20783 | 3.06811  |
| F  | 2.54637  | 5.10579  | -1.3986  |
| F  | -7.31871 | 3.40245  | 0.85188  |
| F  | 7.07956  | -1.268   | -3.43225 |
| F  | -8.3415  | 2.87505  | -1.62087 |
| F  | 8.5922   | -2.52766 | -1.54208 |
| F  | -6.8262  | 1.56903  | -3.47706 |
| F  | 7.56658  | -2.99207 | 0.94197  |
| F  | -4.30716 | 0.79934  | -2.86983 |
| F  | 5.05027  | -2.2063  | 1.53969  |
| F  | -2.29393 | -4.7461  | -1.29318 |
| F  | 0.76105  | 4.66009  | 2.96857  |
| F  | -3.07301 | -7.25549 | -0.65878 |
| F  | 1.53738  | 7.18598  | 3.53834  |
| F  | -2.57965 | -8.2539  | 1.83086  |
| F  | 2.82311  | 8.6795   | 1.65065  |
| F  | -1.29838 | -6.72056 | 3.6896   |
| F  | 3.32316  | 7.62829  | -0.81581 |
| N  | 1.87655  | 1.07201  | 0.08552  |
| N  | -1.62794 | -0.68257 | 0.10217  |
| C  | 2.55857  | -3.25159 | -0.17938 |
| C  | 1.38483  | -3.83986 | 0.16243  |
| H  | 1.1768   | -4.89399 | 0.27514  |
| H  | 3.50445  | -3.72912 | -0.38872 |
| C  | -3.31892 | -2.23549 | 0.40763  |
| C  | -3.91078 | -1.06607 | 0.05732  |
| H  | -3.79425 | -3.17842 | 0.63454  |
| H  | -4.96608 | -0.85921 | -0.04629 |
| Ni | 0.12432  | 0.19453  | 0.08004  |
| C  | -2.3089  | 3.63371  | -0.2658  |
| C  | -1.13601 | 4.22975  | 0.06529  |
| C  | 3.56695  | 2.63173  | 0.35775  |
| C  | 4.15942  | 1.45466  | 0.0352   |
| H  | 5.21486  | 1.24562  | -0.06229 |
| H  | 4.04183  | 3.57972  | 0.56356  |
| H  | -0.92816 | 5.28622  | 0.15373  |
| H  | -3.2541  | 4.10626  | -0.48905 |

[Ni-1]

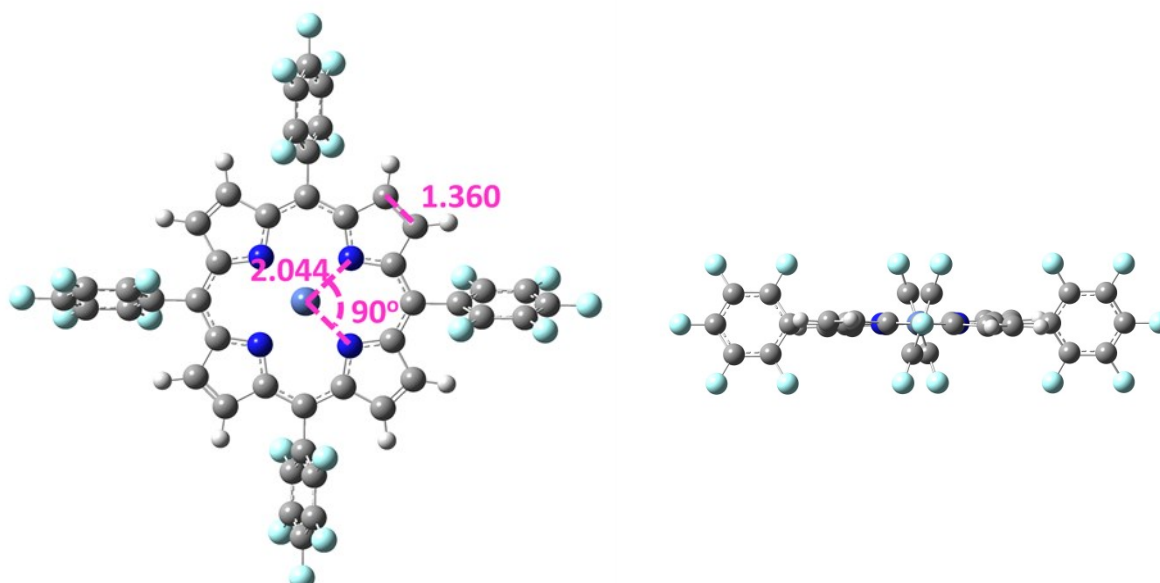

Charge = -1 Multiplicity = 2

|   |          |          |          |
|---|----------|----------|----------|
| C | -3.15227 | 1.24913  | 0.06287  |
| C | 3.40055  | -0.86109 | 0.09517  |
| C | -2.92688 | -0.13767 | 0.10182  |
| C | 3.17502  | 0.52627  | 0.10154  |
| N | 1.05745  | -1.62532 | 0.10397  |
| N | -0.80917 | 2.01346  | 0.05912  |
| C | -1.92626 | -2.08961 | 0.12656  |
| C | 2.17443  | 2.47829  | 0.0787   |
| C | -0.93111 | -3.0821  | 0.11762  |
| C | 1.17935  | 3.47032  | 0.04416  |
| C | 0.45607  | -2.85693 | 0.09419  |
| C | -0.20781 | 3.24454  | 0.02228  |
| C | 2.40822  | -1.85641 | 0.08393  |
| C | -2.15991 | 2.24392  | 0.03064  |
| C | -4.57584 | 1.70753  | 0.05552  |
| C | 4.82417  | -1.31926 | 0.10016  |
| C | -5.16073 | 2.3086   | 1.17608  |
| C | 5.64234  | -1.19208 | -1.02833 |
| C | -6.48452 | 2.74386  | 1.18028  |
| C | 6.97107  | -1.61227 | -1.03481 |
| C | -7.26782 | 2.57626  | 0.04228  |
| C | 7.51663  | -2.18667 | 0.10933  |
| C | -6.72027 | 1.97913  | -1.0892  |
| C | 6.73112  | -2.33225 | 1.24882  |
| C | -5.39177 | 1.55847  | -1.07185 |
| C | 5.40715  | -1.89776 | 1.23355  |
| C | -1.38951 | -4.5056  | 0.13408  |
| C | 1.63757  | 4.89386  | 0.02995  |
| C | -1.97632 | -5.10248 | -0.98771 |
| C | 1.49576  | 5.72411  | 1.14781  |
| C | -2.41125 | -6.42638 | -0.98343 |
| C | 1.9161   | 7.0528   | 1.14551  |
| C | -2.25776 | -7.19764 | 0.16474  |
| C | 2.50551  | 7.58599  | 0.00318  |
| C | -1.67498 | -6.638   | 1.29779  |
| C | 2.66585  | 6.78829  | -1.12582 |
| C | -1.25447 | -5.3096  | 1.27176  |
| C | 2.231    | 5.46457  | -1.10198 |
| F | -4.44877 | 2.48143  | 2.29743  |
| F | 5.15782  | -0.65445 | -2.15548 |
| F | -0.70868 | -4.81127 | 2.38894  |
| F | 2.39662  | 4.73845  | -2.21533 |
| F | -7.01345 | 3.31472  | 2.274    |
| F | 7.72598  | -1.47627 | -2.13635 |
| F | -8.54369 | 2.98847  | 0.0364   |
| F | 8.79273  | -2.59821 | 0.1142   |
| F | -7.47305 | 1.82187  | -2.18936 |
| F | 7.25823  | -2.88122 | 2.35458  |
| F | -4.90534 | 0.99856  | -2.18727 |
| F | 4.69322  | -2.04873 | 2.35682  |
| F | -2.1351  | -4.40256 | -2.11867 |
| F | 0.94336  | 5.25177  | 2.27298  |
| F | -2.9682  | -6.96692 | -2.07865 |
| F | 1.76599  | 7.81947  | 2.23706  |
| F | -2.66966 | -8.47355 | 0.17888  |
| F | 2.91738  | 8.86192  | -0.01001 |
| F | -1.53124 | -7.37916 | 2.40764  |
| F | 3.22935  | 7.30351  | -2.22986 |
| N | 1.94365  | 1.12733  | 0.06971  |
| N | -1.69542 | -0.73923 | 0.08706  |
| C | 2.6705   | -3.28345 | 0.0435   |
| C | 1.4611   | -3.90322 | 0.05001  |

|    |          |          |          |
|----|----------|----------|----------|
| H  | 1.26776  | -4.96695 | 0.01583  |
| H  | 3.64668  | -3.74767 | 0.00352  |
| C  | -3.3528  | -2.35123 | 0.18482  |
| C  | -3.97264 | -1.14193 | 0.16952  |
| H  | -3.81661 | -3.32677 | 0.24183  |
| H  | -5.03596 | -0.94806 | 0.21228  |
| Ni | 0.12413  | 0.19405  | 0.07997  |
| C  | -2.42215 | 3.66961  | -0.04334 |
| C  | -1.21277 | 4.28944  | -0.04853 |
| C  | 3.60082  | 2.74118  | 0.13484  |
| C  | 4.22063  | 1.53188  | 0.14879  |
| H  | 5.28383  | 1.33911  | 0.19877  |
| H  | 4.06451  | 3.71777  | 0.17065  |
| H  | -1.01943 | 5.3521   | -0.10714 |
| H  | -3.39822 | 4.1328   | -0.09617 |

[Ni-1]<sup>2-</sup>

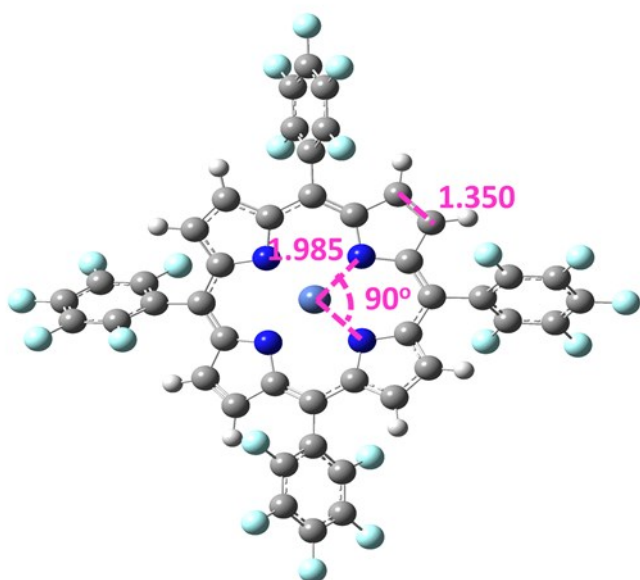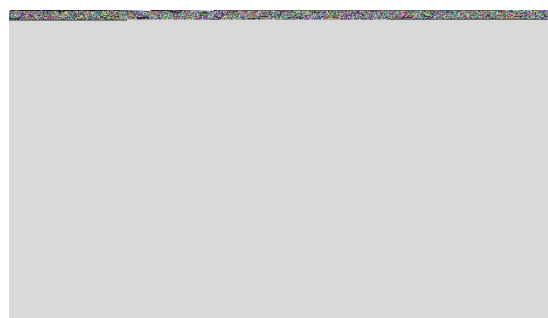

Charge = -2 Multiplicity = 3

|   |          |          |          |
|---|----------|----------|----------|
| C | -3.14291 | 1.2369   | -0.32321 |
| C | 3.39227  | -0.85761 | -0.29145 |
| C | -2.89778 | -0.09587 | -0.07414 |
| C | 3.14653  | 0.48047  | -0.07297 |
| N | 1.02493  | -1.58334 | -0.05267 |
| N | -0.77623 | 1.96799  | -0.0955  |
| C | -1.9042  | -2.04292 | 0.26381  |
| C | 2.15207  | 2.43472  | 0.21757  |
| C | -0.96558 | -3.05224 | 0.28022  |
| C | 1.21345  | 3.44409  | 0.20865  |
| C | 0.4133   | -2.82198 | -0.04411 |
| C | -0.16472 | 3.20662  | -0.1131  |
| C | 2.35347  | -1.83782 | -0.3634  |
| C | -2.10414 | 2.21544  | -0.41421 |
| C | -4.54618 | 1.69769  | -0.41773 |
| C | 4.79569  | -1.32019 | -0.37246 |
| C | -5.10364 | 2.62577  | 0.48239  |
| C | 5.66547  | -0.88455 | -1.3896  |
| C | -6.41923 | 3.06781  | 0.38616  |
| C | 6.99087  | -1.30311 | -1.47985 |
| C | -7.24726 | 2.5811   | -0.62373 |



|    |          |          |          |
|----|----------|----------|----------|
| C  | 7.49766  | -2.20695 | -0.55324 |
| C  | -6.738   | 1.65916  | -1.53094 |
| C  | 6.66668  | -2.67392 | 0.46353  |
| C  | -5.41295 | 1.24215  | -1.42853 |
| C  | 5.35075  | -2.23033 | 0.5473   |
| C  | -1.36617 | -4.43538 | 0.60363  |
| C  | 1.61342  | 4.83431  | 0.50127  |
| C  | -2.31185 | -5.16274 | -0.14604 |
| C  | 1.02882  | 5.56473  | 1.55718  |
| C  | -2.68632 | -6.4666  | 0.16915  |
| C  | 1.37235  | 6.88038  | 1.84463  |
| C  | -2.09082 | -7.12217 | 1.2404   |
| C  | 2.336    | 7.53509  | 1.07776  |
| C  | -1.12743 | -6.45078 | 1.99304  |
| C  | 2.93291  | 6.85581  | 0.02218  |
| C  | -0.78288 | -5.14217 | 1.67625  |
| C  | 2.5595   | 5.54489  | -0.26373 |
| F  | -4.38144 | 3.09459  | 1.50842  |
| F  | 5.23047  | -0.04256 | -2.3417  |
| F  | 0.11689  | -4.54302 | 2.46817  |
| F  | 3.1337   | 4.97558  | -1.33911 |
| F  | -6.91862 | 3.93833  | 1.28763  |
| F  | 7.78331  | -0.8611  | -2.47802 |
| F  | -8.52871 | 2.99271  | -0.71257 |
| F  | 8.77947  | -2.61985 | -0.63009 |
| F  | -7.52761 | 1.19768  | -2.52248 |
| F  | 7.16359  | -3.52626 | 1.38357  |
| F  | -4.97539 | 0.38132  | -2.3624  |
| F  | 4.62584  | -2.67904 | 1.58043  |
| F  | -2.88468 | -4.61771 | -1.2347  |
| F  | 0.1286   | 4.98304  | 2.36149  |
| F  | -3.59812 | -7.11782 | -0.58369 |
| F  | 0.80992  | 7.52543  | 2.888    |
| F  | -2.4447  | -8.38631 | 1.55453  |
| F  | 2.68878  | 8.80629  | 1.36329  |
| F  | -0.56632 | -7.07223 | 3.05137  |
| F  | 3.84513  | 7.49035  | -0.74423 |
| N  | 1.90273  | 1.09447  | -0.03992 |
| N  | -1.65409 | -0.70891 | -0.02361 |
| C  | 2.55051  | -3.2076  | -0.61375 |
| C  | 1.32542  | -3.83256 | -0.40008 |
| H  | 1.09158  | -4.88445 | -0.50471 |
| H  | 3.48665  | -3.66998 | -0.89973 |
| C  | -3.32588 | -2.23996 | 0.48712  |
| C  | -3.93458 | -1.05892 | 0.24641  |
| H  | -3.78805 | -3.17421 | 0.77454  |
| H  | -4.99113 | -0.83463 | 0.30855  |
| Ni | 0.12433  | 0.19271  | -0.03819 |
| C  | -2.30095 | 3.57941  | -0.69482 |
| C  | -1.07633 | 4.20906  | -0.49271 |
| C  | 3.5731   | 2.63696  | 0.44011  |
| C  | 4.18241  | 1.45064  | 0.22857  |
| H  | 5.23874  | 1.22785  | 0.29916  |
| H  | 4.03449  | 3.57756  | 0.70742  |
| H  | -0.84242 | 5.25841  | -0.62017 |
| H  | -3.23667 | 4.03519  | -0.9925  |

[H-Ni-1]<sup>0</sup>

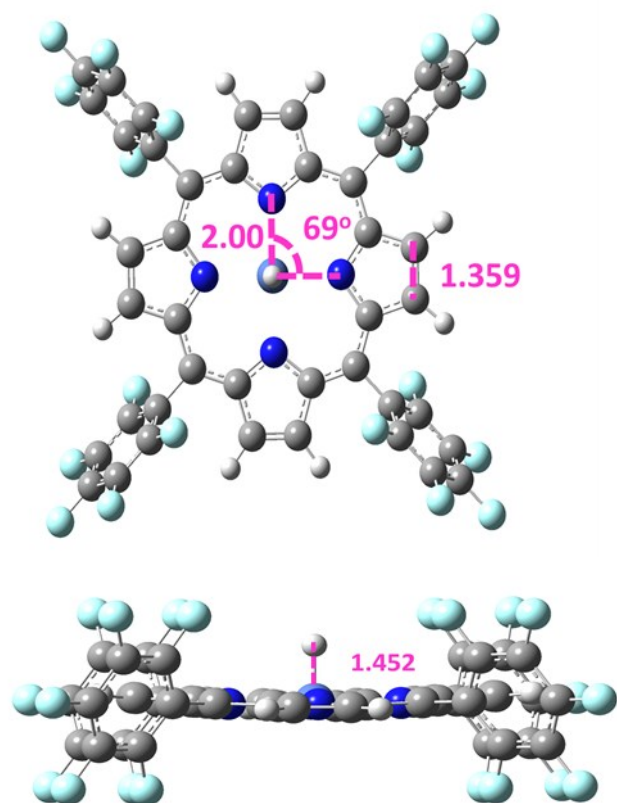

Charge = 0 Multiplicity = 2

|   |          |          |          |
|---|----------|----------|----------|
| C | -3.15227 | 1.24913  | 0.06287  |
| C | 3.40055  | -0.86109 | 0.09517  |
| C | -2.92688 | -0.13767 | 0.10182  |
| C | 3.17502  | 0.52627  | 0.10154  |
| N | 1.05745  | -1.62532 | 0.10397  |
| N | -0.80917 | 2.01346  | 0.05912  |
| C | -1.92626 | -2.08961 | 0.12656  |
| C | 2.17443  | 2.47829  | 0.0787   |
| C | -0.93111 | -3.0821  | 0.11762  |
| C | 1.17935  | 3.47032  | 0.04416  |
| C | 0.45607  | -2.85693 | 0.09419  |
| C | -0.20781 | 3.24454  | 0.02228  |
| C | 2.40822  | -1.85641 | 0.08393  |
| C | -2.15991 | 2.24392  | 0.03064  |
| C | -4.57584 | 1.70753  | 0.05552  |
| C | 4.82417  | -1.31926 | 0.10016  |
| C | -5.16073 | 2.3086   | 1.17608  |
| C | 5.64234  | -1.19208 | -1.02833 |
| C | -6.48452 | 2.74386  | 1.18028  |
| C | 6.97107  | -1.61227 | -1.03481 |
| C | -7.26782 | 2.57626  | 0.04228  |
| C | 7.51663  | -2.18667 | 0.10933  |
| C | -6.72027 | 1.97913  | -1.0892  |
| C | 6.73112  | -2.33225 | 1.24882  |
| C | -5.39177 | 1.55847  | -1.07185 |
| C | 5.40715  | -1.89776 | 1.23355  |
| C | -1.38951 | -4.5056  | 0.13408  |
| C | 1.63757  | 4.89386  | 0.02995  |
| C | -1.97632 | -5.10248 | -0.98771 |
| C | 1.49576  | 5.72411  | 1.14781  |
| C | -2.41125 | -6.42638 | -0.98343 |
| C | 1.9161   | 7.0528   | 1.14551  |
| C | -2.25776 | -7.19764 | 0.16474  |
| C | 2.50551  | 7.58599  | 0.00318  |

|    |          |          |          |
|----|----------|----------|----------|
| C  | -1.67498 | -6.638   | 1.29779  |
| C  | 2.66585  | 6.78829  | -1.12582 |
| C  | -1.25447 | -5.3096  | 1.27176  |
| C  | 2.231    | 5.46457  | -1.10198 |
| F  | -4.44877 | 2.48143  | 2.29743  |
| F  | 5.15782  | -0.65445 | -2.15548 |
| F  | -0.70868 | -4.81127 | 2.38894  |
| F  | 2.39662  | 4.73845  | -2.21533 |
| F  | -7.01345 | 3.31472  | 2.274    |
| F  | 7.72598  | -1.47627 | -2.13635 |
| F  | -8.54369 | 2.98847  | 0.0364   |
| F  | 8.79273  | -2.59821 | 0.1142   |
| F  | -7.47305 | 1.82187  | -2.18936 |
| F  | 7.25823  | -2.88122 | 2.35458  |
| F  | -4.90534 | 0.99856  | -2.18727 |
| F  | 4.69322  | -2.04873 | 2.35682  |
| F  | -2.1351  | -4.40256 | -2.11867 |
| F  | 0.94336  | 5.25177  | 2.27298  |
| F  | -2.9682  | -6.96692 | -2.07865 |
| F  | 1.76599  | 7.81947  | 2.23706  |
| F  | -2.66966 | -8.47355 | 0.17888  |
| F  | 2.91738  | 8.86192  | -0.01001 |
| F  | -1.53124 | -7.37916 | 2.40764  |
| F  | 3.22935  | 7.30351  | -2.22986 |
| N  | 1.94365  | 1.12733  | 0.06971  |
| N  | -1.69542 | -0.73923 | 0.08706  |
| C  | 2.6705   | -3.28345 | 0.0435   |
| C  | 1.4611   | -3.90322 | 0.05001  |
| H  | 1.26776  | -4.96695 | 0.01583  |
| H  | 3.64668  | -3.74767 | 0.00352  |
| C  | -3.3528  | -2.35123 | 0.18482  |
| C  | -3.97264 | -1.14193 | 0.16952  |
| H  | -3.81661 | -3.32677 | 0.24183  |
| H  | -5.03596 | -0.94806 | 0.21228  |
| Ni | 0.12413  | 0.19405  | 0.07997  |
| C  | -2.42215 | 3.66961  | -0.04334 |
| C  | -1.21277 | 4.28944  | -0.04853 |
| C  | 3.60082  | 2.74118  | 0.13484  |
| C  | 4.22063  | 1.53188  | 0.14879  |
| H  | 5.28383  | 1.33911  | 0.19877  |
| H  | 4.06451  | 3.71777  | 0.17065  |
| H  | -1.01943 | 5.3521   | -0.10714 |
| H  | -3.39822 | 4.1328   | -0.09617 |
| H  | 0.14135  | 0.17195  | 1.7505   |

[H-Ni-1]

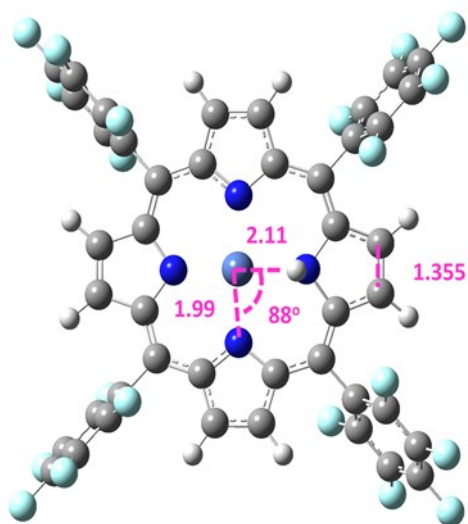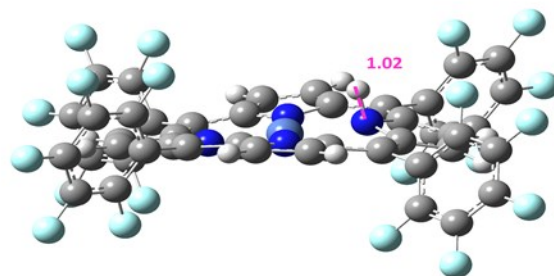

Charge = -1 Multiplicity = 1

|   |          |          |          |
|---|----------|----------|----------|
| C | -3.14329 | 1.24064  | -0.09413 |
| C | 3.43231  | -0.8555  | 0.26817  |
| C | -2.88024 | -0.10131 | -0.22341 |
| C | 3.24309  | 0.49101  | 0.26383  |
| N | 1.03253  | -1.58197 | 0.24715  |
| N | -0.78427 | 1.96991  | 0.2132   |
| C | -1.88041 | -2.07625 | -0.13667 |
| C | 2.19416  | 2.54474  | 0.32607  |
| C | -0.95451 | -3.06934 | 0.06749  |
| C | 1.21004  | 3.48392  | 0.34975  |
| C | 0.44252  | -2.8267  | 0.25714  |
| C | -0.18828 | 3.22259  | 0.36256  |
| C | 2.40037  | -1.83418 | 0.34549  |
| C | -2.13491 | 2.22835  | 0.13739  |
| C | -4.55707 | 1.69929  | -0.1486  |
| C | 4.83483  | -1.34566 | 0.12514  |
| C | -5.21434 | 2.21834  | 0.97615  |
| C | 5.27996  | -1.97929 | -1.04157 |
| C | -6.53271 | 2.66452  | 0.93159  |
| C | 6.58396  | -2.45141 | -1.1744  |
| C | -7.24728 | 2.58903  | -0.2609  |
| C | 7.48581  | -2.29335 | -0.12515 |
| C | -6.63209 | 2.07347  | -1.39701 |
| C | 7.07714  | -1.66526 | 1.04698  |
| C | -5.30683 | 1.64708  | -1.33173 |
| C | 5.76693  | -1.20376 | 1.15891  |
| C | -1.41607 | -4.48242 | 0.11297  |
| C | 1.64075  | 4.91232  | 0.27409  |
| C | -1.90743 | -5.14025 | -1.02288 |
| C | 2.22295  | 5.55516  | 1.37137  |
| C | -2.33664 | -6.46584 | -0.99247 |
| C | 2.62536  | 6.88869  | 1.32354  |
| C | -2.266   | -7.18638 | 0.19527  |
| C | 2.44646  | 7.6179   | 0.15235  |
| C | -1.77473 | -6.57032 | 1.34315  |
| C | 1.87014  | 7.00862  | -0.95927 |
| C | -1.36564 | -5.24025 | 1.29183  |
| C | 1.47759  | 5.67358  | -0.88919 |
| F | -4.58028 | 2.2877   | 2.15476  |
| F | 4.45437  | -2.13645 | -2.08183 |
| F | -0.92229 | -4.68723 | 2.42926  |
| F | 0.94422  | 5.12515  | -1.98626 |

|    |          |          |          |
|----|----------|----------|----------|
| F  | -7.12891 | 3.14793  | 2.03437  |
| F  | 6.98298  | -3.04663 | -2.30864 |
| F  | -8.52176 | 3.00647  | -0.31201 |
| F  | 8.74354  | -2.74057 | -0.24613 |
| F  | -7.3162  | 2.00508  | -2.55119 |
| F  | 7.9437   | -1.51444 | 2.06081  |
| F  | -4.75726 | 1.17366  | -2.45951 |
| F  | 5.4156   | -0.61128 | 2.30967  |
| F  | -1.97906 | -4.49826 | -2.19791 |
| F  | 2.40808  | 4.89348  | 2.5229   |
| F  | -2.80336 | -7.05887 | -2.10398 |
| F  | 3.17828  | 7.47448  | 2.39697  |
| F  | -2.67253 | -8.46474 | 0.23622  |
| F  | 2.83068  | 8.90054  | 0.09251  |
| F  | -1.71859 | -7.25935 | 2.49517  |
| F  | 1.70762  | 7.70997  | -2.09137 |
| N  | 1.94724  | 1.11699  | 0.53209  |
| N  | -1.63325 | -0.71063 | -0.20107 |
| C  | 2.64313  | -3.21804 | 0.45013  |
| C  | 1.41216  | -3.84601 | 0.4007   |
| H  | 1.21719  | -4.90902 | 0.40581  |
| H  | 3.61321  | -3.68126 | 0.57147  |
| C  | -3.31317 | -2.31848 | -0.22484 |
| C  | -3.92073 | -1.11801 | -0.28456 |
| H  | -3.77819 | -3.29415 | -0.19878 |
| H  | -4.98214 | -0.91481 | -0.31571 |
| Ni | 0.08816  | 0.17618  | 0.10926  |
| C  | -2.39452 | 3.6128   | 0.27004  |
| C  | -1.1684  | 4.23445  | 0.41149  |
| C  | 3.58622  | 2.73058  | 0.02793  |
| C  | 4.2014   | 1.52277  | -0.01683 |
| H  | 5.23064  | 1.3284   | -0.28593 |
| H  | 4.0274   | 3.69148  | -0.19974 |
| H  | -0.97876 | 5.29017  | 0.5516   |
| H  | -3.36599 | 4.0829   | 0.21464  |
| H  | 1.72029  | 0.96925  | 1.52146  |

### Ni-2

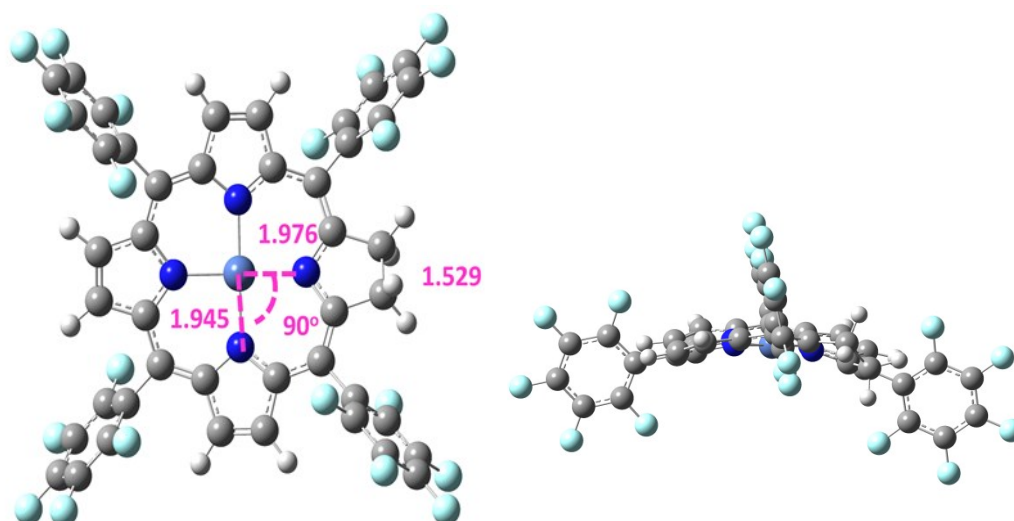

Charge = 0 Multiplicity = 1

|   |          |          |         |
|---|----------|----------|---------|
| C | 2.36472  | 2.35516  | 0.57526 |
| C | -2.3635  | -2.37061 | 0.50418 |
| C | 2.7824   | 1.0481   | 0.39057 |
| C | -2.78273 | -1.05533 | 0.21197 |
| N | -0.00221 | -1.98848 | 0.00004 |
| N | 0.0021   | 1.94603  | 0.00009 |

|   |          |          |          |
|---|----------|----------|----------|
| C | -4.1613  | -0.66638 | 0.04538  |
| C | -4.15576 | 0.63019  | -0.36934 |
| C | 2.78032  | -1.06146 | -0.21204 |
| C | -2.78011 | 1.05422  | -0.39066 |
| C | 2.3582   | -2.37582 | -0.50419 |
| C | -2.35956 | 2.36039  | -0.57518 |
| C | 1.05706  | -2.79212 | -0.33463 |
| C | -1.04639 | 2.78029  | -0.31623 |
| C | -1.06326 | -2.78976 | 0.33475  |
| C | 1.05243  | 2.77795  | 0.31648  |
| C | 3.37568  | 3.38534  | 0.97068  |
| C | -3.40161 | -3.36675 | 0.91416  |
| C | 4.15807  | 4.05939  | 0.02716  |
| C | -3.71    | -3.5787  | 2.2626   |
| C | 5.09577  | 5.02314  | 0.39373  |
| C | -4.68101 | -4.49195 | 2.6709   |
| C | 5.26813  | 5.3358   | 1.74104  |
| C | -5.37711 | -5.22676 | 1.71314  |
| C | 4.50433  | 4.68383  | 2.70739  |
| C | -5.09569 | -5.04365 | 0.36012  |
| C | 3.57376  | 3.72375  | 2.31353  |
| C | -4.12008 | -4.12375 | -0.01808 |
| C | 3.39417  | -3.37415 | -0.91424 |
| C | -3.36827 | 3.39278  | -0.9706  |
| C | 4.11037  | -4.13342 | 0.0179   |
| C | -3.56611 | 3.73113  | -2.3135  |
| C | 5.08411  | -5.05527 | -0.36036 |
| C | -4.49465 | 4.69318  | -2.70736 |
| C | 5.36595  | -5.23806 | -1.71333 |
| C | -5.25658 | 5.34725  | -1.74096 |
| C | 4.67209  | -4.501   | -2.671   |
| C | -5.08439 | 5.03471  | -0.39359 |
| C | 3.70289  | -3.58585 | -2.26265 |
| C | -4.14875 | 4.06897  | -0.02703 |
| F | 4.01604  | 3.78502  | -1.28015 |
| F | -3.05727 | -2.88947 | 3.21332  |
| F | 3.05227  | -2.8945  | -3.21327 |
| F | -4.00684 | 3.79474  | 1.28032  |
| F | 5.82999  | 5.64918  | -0.53637 |
| F | -4.94857 | -4.66797 | 3.97187  |
| F | 6.16454  | 6.25895  | 2.10522  |
| F | -6.31094 | -6.10653 | 2.0901   |
| F | 4.66954  | 4.9827   | 4.00298  |
| F | -5.76166 | -5.75195 | -0.56261 |
| F | 2.85483  | 3.11405  | 3.26965  |
| F | -3.869   | -3.97832 | -1.33188 |
| F | 3.85887  | -3.98829 | 1.33165  |
| F | -2.84892 | 3.11946  | -3.26967 |
| F | 5.74792  | -5.76573 | 0.56228  |
| F | -4.65969 | 4.99194  | -4.003   |
| F | 6.29802  | -6.11967 | -2.09035 |
| F | -6.15104 | 6.27229  | -2.10513 |
| F | 4.94005  | -4.67672 | -3.97193 |
| F | -5.81682 | 5.66277  | 0.53657  |
| H | -5.0166  | -1.30967 | 0.19798  |
| H | -5.00642 | 1.25455  | -0.60502 |
| N | -1.95194 | -0.00719 | -0.04862 |
| N | 1.95187  | -0.01148 | 0.0486   |
| C | 4.15976  | -0.67554 | -0.04554 |
| C | 4.1571   | 0.62103  | 0.3692   |
| H | 5.01362  | -1.32074 | -0.19814 |
| H | 5.00916  | 1.24349  | 0.60486  |
| C | -0.64361 | 4.15304  | -0.21472 |

|    |          |          |          |
|----|----------|----------|----------|
| C  | 0.65267  | 4.15159  | 0.2151   |
| H  | -1.27422 | 5.00838  | -0.41354 |
| H  | 1.28516  | 5.00553  | 0.41398  |
| Ni | -0.00004 | -0.0098  | 0.00002  |
| C  | -0.63759 | -4.23937 | 0.42951  |
| H  | -0.40197 | -4.49038 | 1.47385  |
| H  | -1.40377 | -4.93524 | 0.0836   |
| C  | 0.62821  | -4.2408  | -0.42928 |
| H  | 1.39286  | -4.93831 | -0.0833  |
| H  | 0.39205  | -4.49137 | -1.4736  |

[Ni-2]<sup>-</sup>

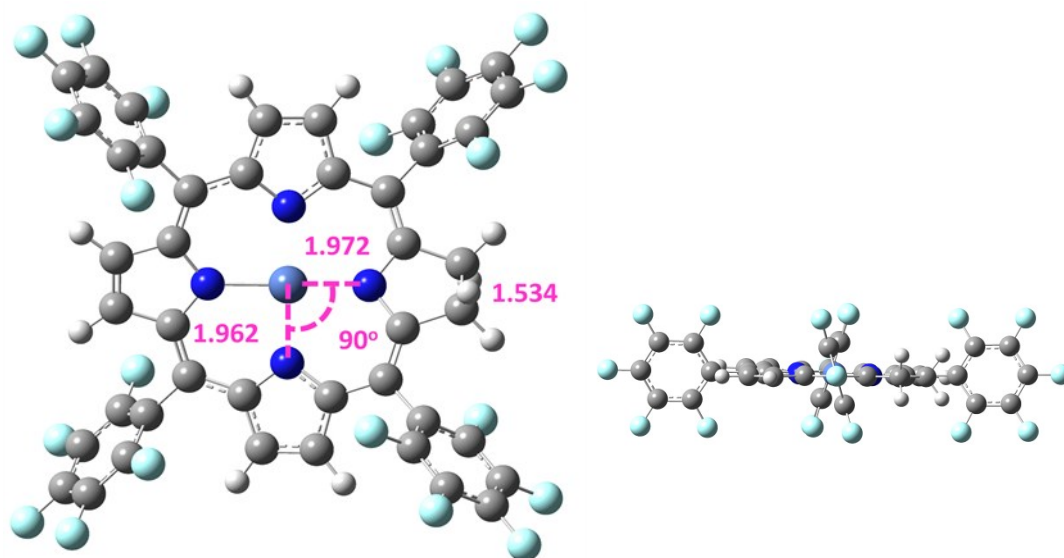

Charge = -1 Multiplicity = 2

|   |          |          |          |
|---|----------|----------|----------|
| C | -2.64807 | 1.41569  | 0.21141  |
| C | 3.66002  | -0.71226 | 0.22415  |
| C | -2.32901 | 0.11612  | 0.2783   |
| C | 3.46521  | 0.6501   | 0.22268  |
| N | 1.39217  | -1.44432 | 0.92566  |
| N | -0.4673  | 2.17787  | 0.87659  |
| C | -1.36296 | -1.76822 | 0.30578  |
| C | 2.45482  | 2.62748  | 0.20181  |
| C | -0.49301 | -2.78658 | 0.27232  |
| C | 1.46175  | 3.58059  | 0.17465  |
| C | 0.81187  | -2.61727 | 0.46369  |
| C | 0.07233  | 3.35374  | 0.37662  |
| C | 2.66527  | -1.70465 | 0.44109  |
| C | -1.75203 | 2.3809   | 0.39415  |
| C | -4.05698 | 1.79654  | -0.11509 |
| C | 5.03464  | -1.21324 | -0.08847 |
| C | -4.92279 | 2.31568  | 0.85365  |
| C | 5.57387  | -1.16576 | -1.37869 |
| C | -6.23571 | 2.67837  | 0.55864  |
| C | 6.84796  | -1.6435  | -1.67785 |
| C | -6.71935 | 2.51957  | -0.73643 |
| C | 7.62444  | -2.20476 | -0.66882 |
| C | -5.88645 | 2.0034   | -1.72462 |
| C | 7.12266  | -2.2732  | 0.62749  |
| C | -4.57538 | 1.65358  | -1.40703 |
| C | 5.84909  | -1.77813 | 0.90122  |
| C | -1.002   | -4.16058 | -0.02731 |
| C | 1.85888  | 4.98686  | -0.14738 |
| C | -1.40518 | -4.52896 | -1.31568 |

|    |          |          |          |
|----|----------|----------|----------|
| C  | 1.85095  | 5.98933  | 0.83078  |
| C  | -1.88143 | -5.80546 | -1.60857 |
| C  | 2.19098  | 7.31116  | 0.54897  |
| C  | -1.95892 | -6.75964 | -0.59851 |
| C  | 2.56246  | 7.66572  | -0.74448 |
| C  | -1.56316 | -6.42868 | 0.69386  |
| C  | 2.5878   | 6.69649  | -1.74246 |
| C  | -1.096   | -5.14361 | 0.96385  |
| C  | 2.23306  | 5.38466  | -1.43575 |
| F  | -4.50547 | 2.47636  | 2.11629  |
| F  | 4.86575  | -0.62745 | -2.38517 |
| F  | -0.73582 | -4.86828 | 2.22434  |
| F  | 2.27702  | 4.48583  | -2.43285 |
| F  | -7.04027 | 3.17187  | 1.51359  |
| F  | 7.32949  | -1.57378 | -2.92929 |
| F  | -7.98194 | 2.86316  | -1.03055 |
| F  | 8.85094  | -2.67274 | -0.94239 |
| F  | -6.3504  | 1.85477  | -2.97566 |
| F  | 7.87396  | -2.80709 | 1.60346  |
| F  | -3.80786 | 1.16972  | -2.39239 |
| F  | 5.41525  | -1.85604 | 2.16637  |
| F  | -1.33863 | -3.6473  | -2.32179 |
| F  | 1.50929  | 5.69546  | 2.09242  |
| F  | -2.25799 | -6.12562 | -2.85687 |
| F  | 2.1714   | 8.24357  | 1.51443  |
| F  | -2.41256 | -7.99224 | -0.86972 |
| F  | 2.89579  | 8.93346  | -1.02726 |
| F  | -1.64178 | -7.34716 | 1.67004  |
| F  | 2.9453   | 7.03523  | -2.99155 |
| N  | 2.2748   | 1.29079  | 0.3995   |
| N  | -1.03208 | -0.40732 | 0.39391  |
| C  | 2.94364  | -3.0976  | 0.24525  |
| C  | 1.74872  | -3.68776 | 0.27795  |
| H  | 1.51035  | -4.70979 | 0.01554  |
| H  | 3.89167  | -3.53541 | -0.03729 |
| C  | -2.76512 | -2.04226 | 0.17336  |
| C  | -3.36836 | -0.86544 | 0.15618  |
| H  | -3.21946 | -3.02061 | 0.09256  |
| H  | -4.42692 | -0.66538 | 0.0585   |
| Ni | 0.88242  | 0.5776   | 0.57731  |
| C  | -2.07171 | 3.76303  | 0.17968  |
| C  | -0.8943  | 4.38872  | 0.15125  |
| C  | 3.91499  | 2.98269  | -0.06585 |
| C  | 4.60817  | 1.6188   | -0.06588 |
| H  | 5.40912  | 1.51693  | 0.67688  |
| H  | 4.29358  | 3.68368  | 0.68932  |
| H  | -0.69308 | 5.4091   | -0.14657 |
| H  | -3.03741 | 4.16095  | -0.10185 |
| H  | 5.04727  | 1.42373  | -1.04955 |
| H  | 4.03159  | 3.4617   | -1.04359 |

[Ni-2]<sup>2-</sup>



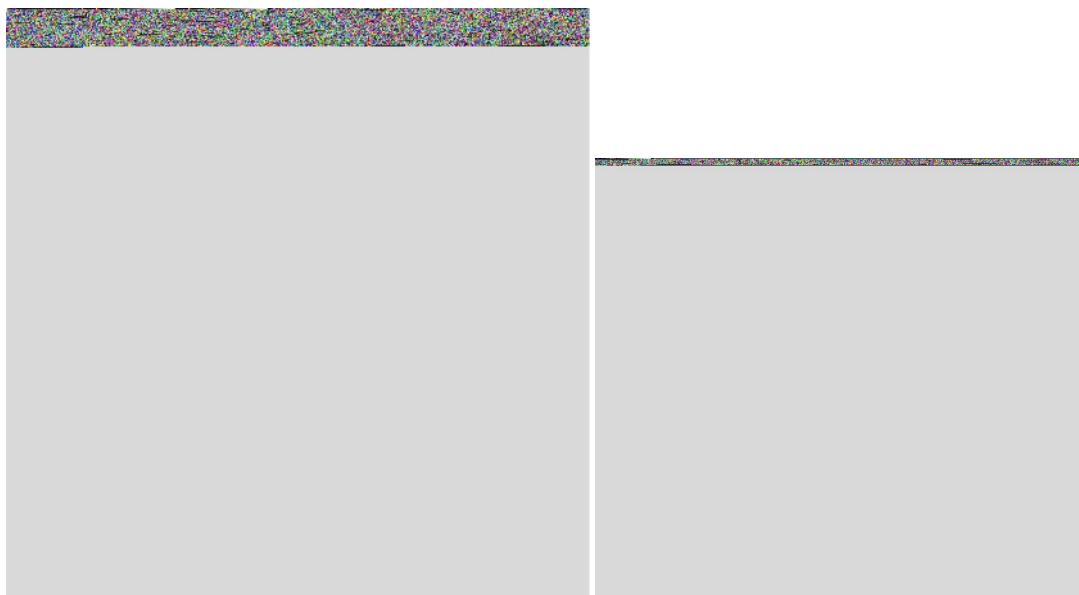

Charge = -2 Multiplicity = 3

|   |          |          |          |
|---|----------|----------|----------|
| C | 2.36472  | 2.35516  | 0.57526  |
| C | -2.3635  | -2.37061 | 0.50418  |
| C | 2.7824   | 1.0481   | 0.39057  |
| C | -2.78273 | -1.05533 | 0.21197  |
| N | -0.00221 | -1.98848 | 0.00004  |
| N | 0.0021   | 1.94603  | 0.00009  |
| C | -4.1613  | -0.66638 | 0.04538  |
| C | -4.15576 | 0.63019  | -0.36934 |
| C | 2.78032  | -1.06146 | -0.21204 |
| C | -2.78011 | 1.05422  | -0.39066 |
| C | 2.3582   | -2.37582 | -0.50419 |
| C | -2.35956 | 2.36039  | -0.57518 |
| C | 1.05706  | -2.79212 | -0.33463 |
| C | -1.04639 | 2.78029  | -0.31623 |
| C | -1.06326 | -2.78976 | 0.33475  |
| C | 1.05243  | 2.77795  | 0.31648  |
| C | 3.37568  | 3.38534  | 0.97068  |
| C | -3.40161 | -3.36675 | 0.91416  |
| C | 4.15807  | 4.05939  | 0.02716  |
| C | -3.71    | -3.5787  | 2.2626   |
| C | 5.09577  | 5.02314  | 0.39373  |
| C | -4.68101 | -4.49195 | 2.6709   |
| C | 5.26813  | 5.3358   | 1.74104  |
| C | -5.37711 | -5.22676 | 1.71314  |
| C | 4.50433  | 4.68383  | 2.70739  |
| C | -5.09569 | -5.04365 | 0.36012  |
| C | 3.57376  | 3.72375  | 2.31353  |
| C | -4.12008 | -4.12375 | -0.01808 |
| C | 3.39417  | -3.37415 | -0.91424 |
| C | -3.36827 | 3.39278  | -0.9706  |
| C | 4.11037  | -4.13342 | 0.0179   |
| C | -3.56611 | 3.73113  | -2.3135  |
| C | 5.08411  | -5.05527 | -0.36036 |
| C | -4.49465 | 4.69318  | -2.70736 |
| C | 5.36595  | -5.23806 | -1.71333 |
| C | -5.25658 | 5.34725  | -1.74096 |
| C | 4.67209  | -4.501   | -2.671   |
| C | -5.08439 | 5.03471  | -0.39359 |
| C | 3.70289  | -3.58585 | -2.26265 |
| C | -4.14875 | 4.06897  | -0.02703 |
| F | 4.01604  | 3.78502  | -1.28015 |
| F | -3.05727 | -2.88947 | 3.21332  |

|    |          |          |          |
|----|----------|----------|----------|
| F  | 3.05227  | -2.8945  | -3.21327 |
| F  | -4.00684 | 3.79474  | 1.28032  |
| F  | 5.82999  | 5.64918  | -0.53637 |
| F  | -4.94857 | -4.66797 | 3.97187  |
| F  | 6.16454  | 6.25895  | 2.10522  |
| F  | -6.31094 | -6.10653 | 2.0901   |
| F  | 4.66954  | 4.9827   | 4.00298  |
| F  | -5.76166 | -5.75195 | -0.56261 |
| F  | 2.85483  | 3.11405  | 3.26965  |
| F  | -3.869   | -3.97832 | -1.33188 |
| F  | 3.85887  | -3.98829 | 1.33165  |
| F  | -2.84892 | 3.11946  | -3.26967 |
| F  | 5.74792  | -5.76573 | 0.56228  |
| F  | -4.65969 | 4.99194  | -4.003   |
| F  | 6.29802  | -6.11967 | -2.09035 |
| F  | -6.15104 | 6.27229  | -2.10513 |
| F  | 4.94005  | -4.67672 | -3.97193 |
| F  | -5.81682 | 5.66277  | 0.53657  |
| H  | -5.0166  | -1.30967 | 0.19798  |
| H  | -5.00642 | 1.25455  | -0.60502 |
| N  | -1.95194 | -0.00719 | -0.04862 |
| N  | 1.95187  | -0.01148 | 0.0486   |
| C  | 4.15976  | -0.67554 | -0.04554 |
| C  | 4.1571   | 0.62103  | 0.3692   |
| H  | 5.01362  | -1.32074 | -0.19814 |
| H  | 5.00916  | 1.24349  | 0.60486  |
| C  | -0.64361 | 4.15304  | -0.21472 |
| C  | 0.65267  | 4.15159  | 0.2151   |
| H  | -1.27422 | 5.00838  | -0.41354 |
| H  | 1.28516  | 5.00553  | 0.41398  |
| Ni | -0.00004 | -0.0098  | 0.00002  |
| C  | -0.63759 | -4.23937 | 0.42951  |
| H  | -0.40197 | -4.49038 | 1.47385  |
| H  | -1.40377 | -4.93524 | 0.0836   |
| C  | 0.62821  | -4.2408  | -0.42928 |
| H  | 1.39286  | -4.93831 | -0.0833  |
| H  | 0.39205  | -4.49137 | -1.4736  |

**[H-Ni-2]<sup>0</sup>**

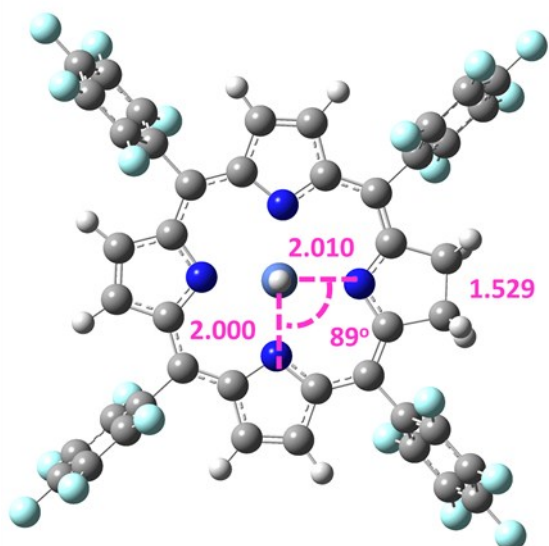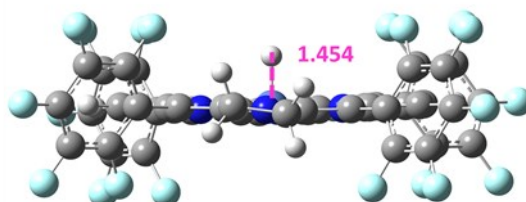

Charge = 0 Multiplicity = 2

|   |          |          |          |
|---|----------|----------|----------|
| C | 2.43792  | 2.44254  | 0.07124  |
| C | -2.43264 | -2.42688 | 0.01948  |
| C | 2.87878  | 1.11226  | 0.06397  |
| C | -2.87452 | -1.0728  | -0.02555 |
| N | -0.00219 | -2.06668 | -0.00002 |
| N | 0.00214  | 2.04512  | 0.00008  |
| C | -4.25861 | -0.6601  | -0.05242 |
| C | -4.25816 | 0.70485  | -0.08237 |
| C | 2.87222  | -1.07886 | 0.02561  |
| C | -2.87646 | 1.11833  | -0.0638  |
| C | 2.42749  | -2.432   | -0.01954 |
| C | -2.43281 | 2.44767  | -0.07105 |
| C | 1.11193  | -2.86185 | -0.04046 |
| C | -1.09459 | 2.87427  | -0.0371  |
| C | -1.11799 | -2.8595  | 0.04034  |
| C | 1.10061  | 2.87195  | 0.03729  |
| C | 3.49078  | 3.50518  | 0.11229  |
| C | -3.50113 | -3.47327 | 0.04744  |
| C | 4.23597  | 3.84652  | -1.02117 |
| C | -3.7953  | -4.20739 | 1.20183  |
| C | 5.22234  | 4.83076  | -0.99247 |
| C | -4.7909  | -5.18127 | 1.23809  |
| C | 5.48244  | 5.50973  | 0.19409  |
| C | -5.54164 | -5.43839 | 0.09519  |
| C | 4.7573   | 5.19786  | 1.34022  |
| C | -5.28232 | -4.7262  | -1.07212 |
| C | 3.78     | 4.20568  | 1.2881   |
| C | -4.27291 | -3.76557 | -1.08426 |
| C | 3.49375  | -3.48066 | -0.04758 |
| C | -3.48339 | 3.51256  | -0.11212 |
| C | 4.26482  | -3.77477 | 1.08413  |
| C | -3.77124 | 4.21351  | -1.288   |
| C | 5.27214  | -4.7376  | 1.07194  |
| C | -4.74634 | 5.20785  | -1.34014 |
| C | 5.52998  | -5.45022 | -0.09542 |
| C | -5.47059 | 5.52153  | -0.19394 |
| C | 4.77987  | -5.19134 | -1.23835 |
| C | -5.2118  | 4.84218  | 0.9927   |
| C | 3.78639  | -4.2153  | -1.20204 |
| C | -4.22763 | 3.85575  | 1.0214   |
| F | 4.01354  | 3.22606  | -2.18729 |
| F | -3.09816 | -3.99664 | 2.33039  |
| F | 3.08977  | -4.00292 | -2.33062 |

|    |          |          |          |
|----|----------|----------|----------|
| F  | -4.00638 | 3.23499  | 2.18758  |
| F  | 5.91849  | 5.13448  | -2.09957 |
| F  | -5.03786 | -5.86651 | 2.36592  |
| F  | 6.42764  | 6.46039  | 0.23282  |
| F  | -6.50649 | -6.36945 | 0.11696  |
| F  | 5.0106   | 5.84983  | 2.48619  |
| F  | -5.99967 | -4.97869 | -2.17834 |
| F  | 3.11279  | 3.93282  | 2.41709  |
| F  | -4.05219 | -3.11661 | -2.23566 |
| F  | 4.04542  | -3.12548 | 2.23559  |
| F  | -3.10481 | 3.93898  | -2.41705 |
| F  | 5.98885  | -4.99179 | 2.17819  |
| F  | -4.99836 | 5.86021  | -2.48617 |
| F  | 6.49279  | -6.38338 | -0.11723 |
| F  | -6.41366 | 6.4743   | -0.23266 |
| F  | 5.0254   | -5.877   | -2.36624 |
| F  | -5.90708 | 5.14765  | 2.09986  |
| H  | -5.11978 | -1.31443 | -0.04051 |
| H  | -5.11752 | 1.36109  | -0.11569 |
| N  | -2.05577 | 0.01033  | -0.03216 |
| N  | 2.05576  | 0.00599  | 0.03224  |
| C  | 4.25718  | -0.66907 | 0.05259  |
| C  | 4.2596   | 0.69587  | 0.08258  |
| H  | 5.11698  | -1.3252  | 0.0407   |
| H  | 5.12032  | 1.35032  | 0.11599  |
| C  | -0.67579 | 4.25851  | -0.02244 |
| C  | 0.68472  | 4.25707  | 0.02265  |
| H  | -1.33176 | 5.11857  | -0.03684 |
| H  | 1.34248  | 5.11577  | 0.03707  |
| Ni | -0.00002 | -0.00154 | 0.00003  |
| C  | -0.75665 | -4.33678 | 0.13493  |
| H  | -0.98503 | -4.71204 | 1.14037  |
| H  | -1.32008 | -4.95196 | -0.57359 |
| C  | 0.74746  | -4.33836 | -0.13517 |
| H  | 1.30958  | -4.9548  | 0.57329  |
| H  | 0.97504  | -4.71401 | -1.14064 |
| H  | 0.14408  | 0.08781  | 1.39162  |

[H-Ni-2]<sup>-</sup>

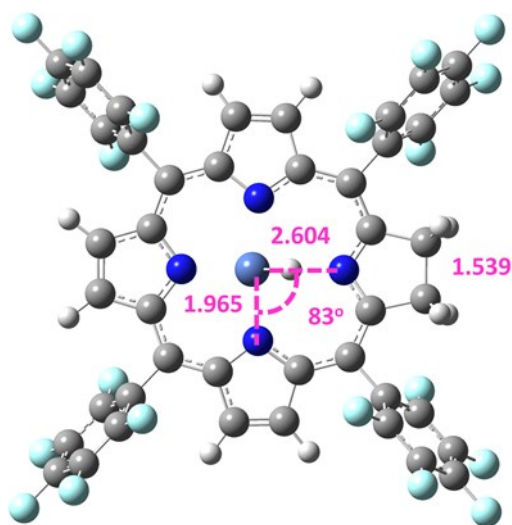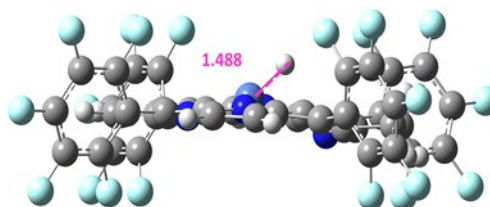

Charge = -1 Multiplicity = 1

|   |          |          |         |
|---|----------|----------|---------|
| C | -2.9712  | 1.16287  | 0.23611 |
| C | 3.60118  | -0.84257 | 0.0726  |
| C | -2.79094 | -0.23503 | 0.17065 |

|   |          |          |          |
|---|----------|----------|----------|
| C | 3.49706  | 0.53157  | -0.16429 |
| N | 1.19356  | -1.59907 | 0.36094  |
| N | -0.58271 | 1.85535  | 0.33569  |
| C | -1.79108 | -2.18003 | 0.18213  |
| C | 2.49392  | 2.48124  | -0.18154 |
| C | -0.75948 | -3.13918 | 0.26253  |
| C | 1.43549  | 3.36863  | 0.03673  |
| C | 0.61     | -2.85499 | 0.30807  |
| C | 0.04648  | 3.06354  | 0.17935  |
| C | 2.54313  | -1.79272 | 0.21684  |
| C | -1.94325 | 2.11165  | 0.27509  |
| C | -4.37718 | 1.6655   | 0.2411   |
| C | 4.98818  | -1.37916 | 0.22268  |
| C | -4.93592 | 2.2765   | 1.37063  |
| C | 5.91639  | -1.3588  | -0.82636 |
| C | -6.24875 | 2.74342  | 1.38962  |
| C | 7.21635  | -1.83963 | -0.68997 |
| C | -7.04805 | 2.59941  | 0.2596   |
| C | 7.62659  | -2.37594 | 0.52646  |
| C | -6.52676 | 1.99389  | -0.87987 |
| C | 6.7341   | -2.41757 | 1.59381  |
| C | -5.2091  | 1.541    | -0.87849 |
| C | 5.44219  | -1.92077 | 1.43484  |
| C | -1.16894 | -4.57502 | 0.27753  |
| C | 1.80601  | 4.81142  | 0.16324  |
| C | -1.74321 | -5.18917 | -0.84232 |
| C | 1.62996  | 5.51677  | 1.36328  |
| C | -2.14127 | -6.52434 | -0.83551 |
| C | 1.97902  | 6.85874  | 1.4991   |
| C | -1.96333 | -7.29046 | 0.31262  |
| C | 2.53409  | 7.54143  | 0.42052  |
| C | -1.39242 | -6.71403 | 1.44325  |
| C | 2.73152  | 6.87458  | -0.78441 |
| C | -1.00817 | -5.37476 | 1.41584  |
| C | 2.36408  | 5.53596  | -0.89788 |
| F | -4.21162 | 2.42399  | 2.48708  |
| F | 5.57058  | -0.85888 | -2.025   |
| F | -0.47728 | -4.86155 | 2.53284  |
| F | 2.56938  | 4.94364  | -2.08659 |
| F | -6.75277 | 3.32096  | 2.49137  |
| F | 8.07178  | -1.80229 | -1.72468 |
| F | -8.31341 | 3.04267  | 0.26855  |
| F | 8.87416  | -2.84643 | 0.67051  |
| F | -7.29348 | 1.86204  | -1.97381 |
| F | 7.13142  | -2.92418 | 2.77159  |
| F | -4.7472  | 0.98004  | -2.00394 |
| F | 4.63008  | -1.96927 | 2.49788  |
| F | -1.91917 | -4.49758 | -1.97602 |
| F | 1.11735  | 4.90384  | 2.43725  |
| F | -2.68354 | -7.08136 | -1.92988 |
| F | 1.79763  | 7.49717  | 2.6658   |
| F | -2.33964 | -8.57725 | 0.32866  |
| F | 2.8784   | 8.83182  | 0.54316  |
| F | -1.22657 | -7.44967 | 2.5535   |
| F | 3.26103  | 7.52936  | -1.83059 |
| N | 2.33224  | 1.16373  | -0.34325 |
| N | -1.56983 | -0.83708 | 0.13793  |
| C | 2.8217   | -3.21532 | 0.13284  |
| C | 1.63287  | -3.86704 | 0.18871  |
| H | 1.46007  | -4.93086 | 0.10227  |
| H | 3.79921  | -3.65366 | -0.01044 |
| C | -3.20942 | -2.44778 | 0.21018  |
| C | -3.83416 | -1.23252 | 0.20315  |

|    |          |          |          |
|----|----------|----------|----------|
| H  | -3.67235 | -3.42459 | 0.25155  |
| H  | -4.89825 | -1.04085 | 0.2376   |
| Ni | 0.1738   | 0.0625   | 0.61055  |
| C  | -2.16989 | 3.53108  | 0.13834  |
| C  | -0.94758 | 4.11725  | 0.07918  |
| C  | 3.97296  | 2.87564  | -0.1071  |
| C  | 4.67708  | 1.50679  | -0.09063 |
| H  | 5.34984  | 1.3748   | -0.94443 |
| H  | 4.261    | 3.48081  | -0.9732  |
| H  | -0.73447 | 5.16539  | -0.07645 |
| H  | -3.13491 | 4.00923  | 0.0428   |
| H  | 4.19214  | 3.468    | 0.78887  |
| H  | 5.27269  | 1.35584  | 0.81727  |
| H  | 1.16634  | 0.5803   | 1.59172  |

### Ni-3

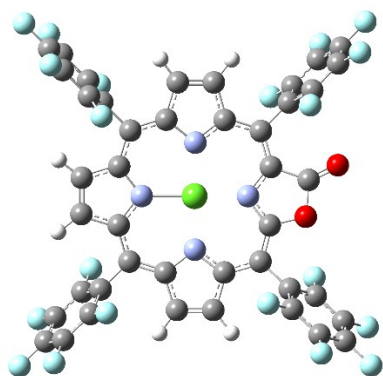

Charge = 0 Multiplicity = 1

|   |          |          |          |
|---|----------|----------|----------|
| C | 2.36577  | 2.32511  | 0.58199  |
| C | -2.35154 | -2.38792 | 0.55994  |
| C | 2.77998  | 1.01858  | 0.38552  |
| C | -2.77122 | -1.07582 | 0.25501  |
| N | -0.00214 | -2.01169 | -0.00004 |
| N | 0.0021   | 1.91461  | -0.00002 |
| C | -4.15026 | -0.69791 | 0.06945  |
| C | -4.14948 | 0.5892   | -0.37155 |
| C | 2.76894  | -1.08183 | -0.25493 |
| C | -2.77773 | 1.02461  | -0.38543 |
| C | 2.34643  | -2.393   | -0.55999 |
| C | -2.36069 | 2.33023  | -0.58197 |
| C | 1.05116  | -2.81577 | -0.35586 |
| C | -1.04657 | 2.74954  | -0.31925 |
| C | -1.0572  | -2.81349 | 0.35567  |
| C | 1.05258  | 2.74726  | 0.31918  |
| C | 3.36665  | 3.35585  | 0.98809  |
| C | -3.38919 | -3.35615 | 1.02582  |
| C | 4.32532  | 3.85235  | 0.1006   |
| C | -3.85809 | -3.31415 | 2.34262  |
| C | 5.24957  | 4.82129  | 0.48053  |
| C | -4.8428  | -4.18148 | 2.80699  |
| C | 5.22374  | 5.32353  | 1.77851  |
| C | -5.38739 | -5.1262  | 1.94208  |
| C | 4.27773  | 4.85357  | 2.68524  |
| C | -4.94406 | -5.19591 | 0.62424  |
| C | 3.36594  | 3.8823   | 2.28297  |
| C | -3.96224 | -4.31349 | 0.18432  |
| C | 3.38198  | -3.36349 | -1.02584 |
| C | -3.35936 | 3.36314  | -0.98799 |
| C | 3.95259  | -4.32239 | -0.18445 |

|    |          |          |          |
|----|----------|----------|----------|
| C  | -3.35773 | 3.88949  | -2.28291 |
| C  | 4.93235  | -5.20707 | -0.6244  |
| C  | -4.26745 | 4.86275  | -2.68507 |
| C  | 5.37612  | -5.13812 | -1.94214 |
| C  | -5.21224 | 5.33486  | -1.7782  |
| C  | 4.83397  | -4.19188 | -2.80692 |
| C  | -5.23893 | 4.83278  | -0.48017 |
| C  | 3.85125  | -3.32231 | -2.34253 |
| C  | -4.31676 | 3.86182  | -0.10035 |
| F  | 4.37301  | 3.39621  | -1.16042 |
| F  | -3.35587 | -2.41466 | 3.20257  |
| F  | 3.35134  | -2.42143 | -3.20239 |
| F  | -4.36522 | 3.40587  | 1.16071  |
| F  | 6.15617  | 5.27565  | -0.39348 |
| F  | -5.26684 | -4.11346 | 4.07524  |
| F  | 6.10587  | 6.25404  | 2.15357  |
| F  | -6.33226 | -5.96585 | 2.37552  |
| F  | 4.25304  | 5.33404  | 3.93443  |
| F  | -5.46754 | -6.10388 | -0.20915 |
| F  | 2.46848  | 3.44844  | 3.18099  |
| F  | -3.55377 | -4.4114  | -1.09197 |
| F  | 3.54365  | -4.41962 | 1.09174  |
| F  | -2.46141 | 3.45357  | -3.18107 |
| F  | 5.45345  | -6.11652 | 0.20887  |
| F  | -4.24194 | 5.34306  | -3.93431 |
| F  | 6.31903  | -5.97996 | -2.37559 |
| F  | -6.09237 | 6.26731  | -2.15315 |
| F  | 5.25841  | -4.12456 | -4.07508 |
| F  | -6.14433 | 5.28924  | 0.39399  |
| H  | -5.00056 | -1.34766 | 0.21939  |
| H  | -5.00132 | 1.19801  | -0.63868 |
| N  | -1.94473 | -0.02782 | -0.0204  |
| N  | 1.94471  | -0.03204 | 0.02044  |
| C  | 4.14878  | -0.70694 | -0.06927 |
| C  | 4.15078  | 0.58017  | 0.37171  |
| H  | 4.99767  | -1.35857 | -0.21915 |
| H  | 5.00393  | 1.18714  | 0.63888  |
| C  | -0.64381 | 4.12055  | -0.21501 |
| C  | 0.65283  | 4.11914  | 0.21486  |
| H  | -1.27651 | 4.97497  | -0.40887 |
| H  | 1.28741  | 4.97217  | 0.4087   |
| Ni | -0.00001 | -0.03577 | 0.00001  |
| C  | 0.62567  | -4.265   | -0.43321 |
| O  | 1.25336  | -5.60822 | -0.38384 |
| O  | -0.63497 | -4.26368 | 0.43272  |

[Ni-3]<sup>2-</sup>

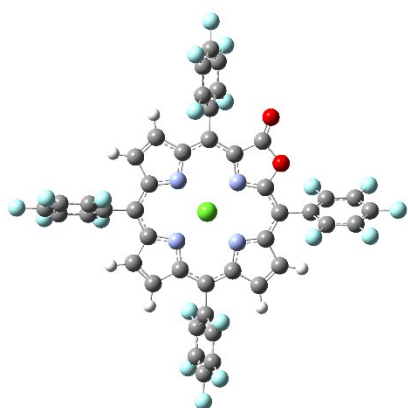

Charge = -2 Multiplicity = 3

|   |          |          |          |
|---|----------|----------|----------|
| C | 2.38223  | 2.35924  | 0.55145  |
| C | -2.37649 | -2.38161 | 0.57786  |
| C | 2.79519  | 1.03639  | 0.35566  |
| C | -2.81357 | -1.06093 | 0.28941  |
| N | -0.01522 | -1.95843 | 0.06623  |
| N | -0.00456 | 1.965    | 0.01015  |
| C | -4.17247 | -0.68429 | 0.11228  |
| C | -4.17156 | 0.62636  | -0.32545 |
| C | 2.76747  | -1.09533 | -0.25607 |
| C | -2.81452 | 1.06212  | -0.34289 |
| C | 2.34035  | -2.41265 | -0.52262 |
| C | -2.38254 | 2.38364  | -0.5478  |
| C | 1.02572  | -2.81236 | -0.27177 |
| C | -1.06387 | 2.803    | -0.29749 |
| C | -1.0669  | -2.74757 | 0.38594  |
| C | 1.07005  | 2.79507  | 0.30974  |
| C | 3.39845  | 3.38171  | 0.92957  |
| C | -3.36615 | -3.4088  | 0.99319  |
| C | 4.36139  | 3.85041  | 0.02913  |
| C | -3.88873 | -3.43231 | 2.29102  |
| C | 5.30407  | 4.81311  | 0.38065  |
| C | -4.83634 | -4.36824 | 2.69642  |
| C | 5.29647  | 5.34539  | 1.66609  |
| C | -5.29016 | -5.32148 | 1.78989  |
| C | 4.34929  | 4.90885  | 2.58715  |
| C | -4.79485 | -5.32787 | 0.48952  |
| C | 3.42098  | 3.94154  | 2.21182  |
| C | -3.85414 | -4.37522 | 0.10794  |
| C | 3.3576   | -3.40426 | -0.96479 |
| C | -3.38099 | 3.41386  | -0.94436 |
| C | 3.88478  | -4.37468 | -0.10703 |
| C | -3.38479 | 3.96621  | -2.23091 |
| C | 4.85412  | -5.28348 | -0.51809 |
| C | -4.29789 | 4.94104  | -2.62359 |
| C | 5.34218  | -5.22804 | -1.82045 |
| C | -5.25065 | 5.39449  | -1.71662 |
| C | 4.84735  | -4.27198 | -2.70093 |
| C | -5.27837 | 4.87087  | -0.42783 |
| C | 3.86893  | -3.38137 | -2.26631 |
| C | -4.35041 | 3.90041  | -0.05924 |
| F | 4.40105  | 3.37186  | -1.22578 |
| F | -3.47769 | -2.53014 | 3.1983   |
| F | 3.41869  | -2.47384 | -3.15137 |
| F | -4.40994 | 3.43222  | 1.19904  |
| F | 6.21387  | 5.23606  | -0.5106  |
| F | -5.31223 | -4.36108 | 3.95158  |
| F | 6.19762  | 6.27264  | 2.0157   |
| F | -6.19917 | -6.23035 | 2.16764  |
| F | 4.34233  | 5.41814  | 3.82863  |
| F | -5.23372 | -6.24583 | -0.38606 |
| F | 2.52745  | 3.54658  | 3.13435  |
| F | -3.39926 | -4.41986 | -1.15518 |
| F | 3.42038  | -4.48647 | 1.14684  |
| F | -2.48591 | 3.55539  | -3.14185 |
| F | 5.3281   | -6.21066 | 0.331    |
| F | -4.27166 | 5.4419   | -3.86883 |
| F | 6.28026  | -6.09621 | -2.22539 |
| F | -6.13776 | 6.32974  | -2.08272 |
| F | 5.31205  | -4.21818 | -3.96025 |
| F | -6.19356 | 5.31085  | 0.45039  |
| H | -5.02427 | -1.33594 | 0.25699  |
| H | -5.02634 | 1.23569  | -0.58727 |



|    |          |          |          |
|----|----------|----------|----------|
| N  | -1.97865 | 0.0067   | 0.01757  |
| N  | 1.94561  | -0.01776 | 0.02081  |
| C  | 4.13994  | -0.71386 | -0.11141 |
| C  | 4.15198  | 0.59023  | 0.32041  |
| H  | 4.98742  | -1.36772 | -0.26826 |
| H  | 5.01482  | 1.19673  | 0.56152  |
| C  | -0.64575 | 4.16801  | -0.19839 |
| C  | 0.66972  | 4.16097  | 0.20378  |
| H  | -1.27754 | 5.02733  | -0.38018 |
| H  | 1.31197  | 5.01388  | 0.37966  |
| Ni | -0.01507 | 0.01118  | 0.02703  |
| C  | 0.57876  | -4.16745 | -0.18722 |
| O  | 1.0336   | -5.28948 | -0.44531 |
| O  | -0.73333 | -4.06375 | 0.40602  |

Ni-4

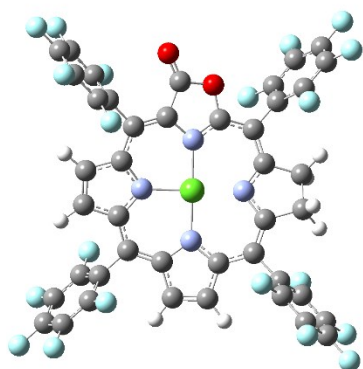

Charge = 0 Multiplicity = 1

|   |          |          |          |
|---|----------|----------|----------|
| C | 2.4013   | 2.35038  | 0.59312  |
| C | -2.31601 | -2.36264 | 0.57107  |
| C | 2.81551  | 1.04385  | 0.39664  |
| C | -2.73569 | -1.05054 | 0.26613  |
| N | 0.03339  | -1.98642 | 0.01109  |
| N | 0.03762  | 1.93989  | 0.0111   |
| C | -4.11474 | -0.67263 | 0.08057  |
| C | -4.11395 | 0.61447  | -0.36042 |
| C | 2.80446  | -1.05656 | -0.24381 |
| C | -2.7422  | 1.04989  | -0.3743  |
| C | 2.38196  | -2.36773 | -0.54886 |
| C | -2.32516 | 2.35551  | -0.57084 |
| C | 1.08669  | -2.79049 | -0.34473 |
| C | -1.01104 | 2.77481  | -0.30813 |
| C | -1.02167 | -2.78821 | 0.3668   |
| C | 1.08811  | 2.77253  | 0.3303   |
| C | 3.40218  | 3.38112  | 0.99922  |
| C | -3.35366 | -3.33088 | 1.03695  |
| C | 4.36085  | 3.87762  | 0.11172  |
| C | -3.82256 | -3.28888 | 2.35374  |
| C | 5.2851   | 4.84657  | 0.49166  |
| C | -4.80727 | -4.15621 | 2.81811  |
| C | 5.25927  | 5.34881  | 1.78964  |
| C | -5.35187 | -5.10093 | 1.95321  |
| C | 4.31326  | 4.87885  | 2.69636  |
| C | -4.90853 | -5.17064 | 0.63536  |
| C | 3.40146  | 3.90758  | 2.2941   |
| C | -3.92671 | -4.28821 | 0.19544  |
| C | 3.41751  | -3.33821 | -1.01471 |
| C | -3.32383 | 3.38842  | -0.97687 |
| C | 3.98811  | -4.29711 | -0.17332 |

|    |          |          |          |
|----|----------|----------|----------|
| C  | -3.3222  | 3.91477  | -2.27179 |
| C  | 4.96788  | -5.1818  | -0.61327 |
| C  | -4.23192 | 4.88802  | -2.67395 |
| C  | 5.41165  | -5.11284 | -1.93101 |
| C  | -5.17671 | 5.36013  | -1.76707 |
| C  | 4.8695   | -4.1666  | -2.79579 |
| C  | -5.2034  | 4.85806  | -0.46904 |
| C  | 3.88678  | -3.29703 | -2.3314  |
| C  | -4.28123 | 3.88709  | -0.08922 |
| F  | 4.40854  | 3.42148  | -1.14929 |
| F  | -3.32034 | -2.38938 | 3.2137   |
| F  | 3.38686  | -2.39615 | -3.19126 |
| F  | -4.32969 | 3.43114  | 1.17183  |
| F  | 6.1917   | 5.30093  | -0.38235 |
| F  | -5.23132 | -4.08818 | 4.08637  |
| F  | 6.1414   | 6.27932  | 2.1647   |
| F  | -6.29673 | -5.94058 | 2.38664  |
| F  | 4.28857  | 5.35932  | 3.94556  |
| F  | -5.43201 | -6.0786  | -0.19802 |
| F  | 2.50401  | 3.47371  | 3.19212  |
| F  | -3.51824 | -4.38612 | -1.08085 |
| F  | 3.57918  | -4.39434 | 1.10287  |
| F  | -2.42588 | 3.47885  | -3.16995 |
| F  | 5.48898  | -6.09124 | 0.21999  |
| F  | -4.20642 | 5.36834  | -3.92319 |
| F  | 6.35456  | -5.95468 | -2.36446 |
| F  | -6.05684 | 6.29259  | -2.14202 |
| F  | 5.29394  | -4.09929 | -4.06395 |
| F  | -6.1088  | 5.31452  | 0.40511  |
| H  | -4.96504 | -1.32239 | 0.23051  |
| H  | -4.96579 | 1.22329  | -0.62756 |
| N  | -1.9092  | -0.00254 | -0.00927 |
| N  | 1.98024  | -0.00676 | 0.03156  |
| C  | 4.18631  | 0.60545  | 0.38284  |
| C  | -0.60828 | 4.14583  | -0.20389 |
| C  | 0.68836  | 4.14442  | 0.22599  |
| H  | -1.24099 | 5.00025  | -0.39774 |
| H  | 1.32294  | 4.99745  | 0.41982  |
| Ni | 0.03552  | -0.01049 | 0.01113  |
| C  | -0.59944 | -4.2384  | 0.44384  |
| H  | -0.36298 | -4.50276 | 1.48332  |
| H  | -1.36609 | -4.92562 | 0.0888   |
| C  | 0.66119  | -4.23972 | -0.42209 |
| H  | 1.42627  | -4.92878 | -0.06724 |
| H  | 0.42413  | -4.50326 | -1.46163 |
| O  | 5.24428  | 1.35813  | 0.71414  |
| O  | 4.18431  | -0.68166 | -0.05815 |

[Ni-4]<sup>2-</sup>

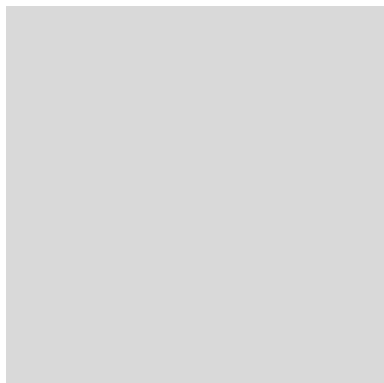

Charge = -2 Multiplicity = 3

|   |          |          |          |
|---|----------|----------|----------|
| C | 2.4013   | 2.35038  | 0.59312  |
| C | -2.31601 | -2.36264 | 0.57107  |
| C | 2.81551  | 1.04385  | 0.39664  |
| C | -2.73569 | -1.05054 | 0.26613  |
| N | 0.03339  | -1.98642 | 0.01109  |
| N | 0.03762  | 1.93989  | 0.0111   |
| C | -4.11474 | -0.67263 | 0.08057  |
| C | -4.11395 | 0.61447  | -0.36042 |
| C | 2.80446  | -1.05656 | -0.24381 |
| C | -2.7422  | 1.04989  | -0.3743  |
| C | 2.38196  | -2.36773 | -0.54886 |
| C | -2.32516 | 2.35551  | -0.57084 |
| C | 1.08669  | -2.79049 | -0.34473 |
| C | -1.01104 | 2.77481  | -0.30813 |
| C | -1.02167 | -2.78821 | 0.3668   |
| C | 1.08811  | 2.77253  | 0.3303   |
| C | 3.40218  | 3.38112  | 0.99922  |
| C | -3.35366 | -3.33088 | 1.03695  |
| C | 4.36085  | 3.87762  | 0.11172  |
| C | -3.82256 | -3.28888 | 2.35374  |
| C | 5.2851   | 4.84657  | 0.49166  |
| C | -4.80727 | -4.15621 | 2.81811  |
| C | 5.25927  | 5.34881  | 1.78964  |
| C | -5.35187 | -5.10093 | 1.95321  |
| C | 4.31326  | 4.87885  | 2.69636  |
| C | -4.90853 | -5.17064 | 0.63536  |
| C | 3.40146  | 3.90758  | 2.2941   |
| C | -3.92671 | -4.28821 | 0.19544  |
| C | 3.41751  | -3.33821 | -1.01471 |
| C | -3.32383 | 3.38842  | -0.97687 |
| C | 3.98811  | -4.29711 | -0.17332 |
| C | -3.3222  | 3.91477  | -2.27179 |
| C | 4.96788  | -5.1818  | -0.61327 |
| C | -4.23192 | 4.88802  | -2.67395 |
| C | 5.41165  | -5.11284 | -1.93101 |
| C | -5.17671 | 5.36013  | -1.76707 |
| C | 4.8695   | -4.1666  | -2.79579 |
| C | -5.2034  | 4.85806  | -0.46904 |
| C | 3.88678  | -3.29703 | -2.3314  |
| C | -4.28123 | 3.88709  | -0.08922 |
| F | 4.40854  | 3.42148  | -1.14929 |
| F | -3.32034 | -2.38938 | 3.2137   |
| F | 3.38686  | -2.39615 | -3.19126 |
| F | -4.32969 | 3.43114  | 1.17183  |
| F | 6.1917   | 5.30093  | -0.38235 |
| F | -5.23132 | -4.08818 | 4.08637  |
| F | 6.1414   | 6.27932  | 2.1647   |
| F | -6.29673 | -5.94058 | 2.38664  |
| F | 4.28857  | 5.35932  | 3.94556  |
| F | -5.43201 | -6.0786  | -0.19802 |
| F | 2.50401  | 3.47371  | 3.19212  |
| F | -3.51824 | -4.38612 | -1.08085 |
| F | 3.57918  | -4.39434 | 1.10287  |
| F | -2.42588 | 3.47885  | -3.16995 |
| F | 5.48898  | -6.09124 | 0.21999  |
| F | -4.20642 | 5.36834  | -3.92319 |
| F | 6.35456  | -5.95468 | -2.36446 |
| F | -6.05684 | 6.29259  | -2.14202 |
| F | 5.29394  | -4.09929 | -4.06395 |

|    |          |          |          |
|----|----------|----------|----------|
| F  | -6.1088  | 5.31452  | 0.40511  |
| H  | -4.96504 | -1.32239 | 0.23051  |
| H  | -4.96579 | 1.22329  | -0.62756 |
| N  | -1.9092  | -0.00254 | -0.00927 |
| N  | 1.98024  | -0.00676 | 0.03156  |
| C  | 4.18631  | 0.60545  | 0.38284  |
| C  | -0.60828 | 4.14583  | -0.20389 |
| C  | 0.68836  | 4.14442  | 0.22599  |
| H  | -1.24099 | 5.00025  | -0.39774 |
| H  | 1.32294  | 4.99745  | 0.41982  |
| Ni | 0.03552  | -0.01049 | 0.01113  |
| C  | -0.59944 | -4.2384  | 0.44384  |
| H  | -0.36298 | -4.50276 | 1.48332  |
| H  | -1.36609 | -4.92562 | 0.0888   |
| C  | 0.66119  | -4.23972 | -0.42209 |
| H  | 1.42627  | -4.92878 | -0.06724 |
| H  | 0.42413  | -4.50326 | -1.46163 |
| O  | 5.24428  | 1.35813  | 0.71414  |
| O  | 4.18431  | -0.68166 | -0.05815 |

## References

- [1] a) Y. Yu, H. Lv, X. Ke, B. Yang, J.-L. Zhang, *Adv. Synth. Catal.* **2012**, *354*, 3509-3516; b) J. S. Lindsey, R. W. Wagner, *J. Org. Chem.* **1989**, *54*, 828-836; c) A. E. Finholt, A. C. B. Jr, K. E. Wilzbach, H. I. Schlesinger, *J. Am. Chem. Soc.* **1947**, *69*, 2692-2696.
- [2] a) L. P. Bheeter, M. Henrion, L. Brelot, C. Darcel, M. J. Chetcuti, J. B. Sortais, V. Ritleng, *Adv. Synth. Catal.* **2012**, *44*, 2619-2624; b) R. A. Gaussian09, *Inc., Wallingford CT 2009*.
- [3] J. Y. Hu, J. Zhang, G. X. Wang, H. L. Sun, J. L. Zhang, *Inorg. Chem.* **2016**, *55*, 2274-2283.
